# Supplementary material for: The Relationship Between Dog-Related Factors and Owners' Attitudes Toward Pets: An Exploratory Cross-Sectional Study in Korea
Source: Front Vet Sci. 2020 Aug 18;7:493. doi: 10.3389/fvets.2020.00493 (PMC7461997; doi:10.3389/fvets.2020.00493)
Supplement: Supplementary file 2 [file Data_Sheet_2.xlsx]

## Sheet: Variable information
Variable Information
Variable	Position	Label	Measurement Level	Role	Column Width
SQ01	1	Is your age between 19 and 39?	Nominal	Input	22
SQ02	2	Do you live in Seoul?	Nominal	Input	22
SQ03	3	Do you currently have a dog	Nominal	Input	22
Q01	4	What is your gender?	Nominal	Input	22
Q021	5	What is your year of birth?	Nominal	Input	22
Q022	6	What is your month of birth?	Nominal	Input	22
Q03	7	Have you ever been married?	Nominal	Input	22
Q031	8	If so, what is your current marital status?	Nominal	Input	22
Q04	9	Do you have a child?	Nominal	Input	22
Q05	10	How do you assess your general health?	Scale	Input	22
Q06	11	What is the highest educational level you have completed?	Nominal	Input	22
Q07	12	In the past week, have you worked more than one hour for pay, or worked as an unpaid family worker for more than 18 hours?	Nominal	Input	22
Q071	13	What type of job do you have?	Nominal	Input	22
Q08	14	How many people live in your household, not including yourself?	Nominal	Input	22
Q09	15	What is your household’s total approximate income for one year? * select annual or monthly	Nominal	Input	22
Q09t	16	Income (ten thsousand won)	Nominal	Input	22
Q10	17	Which of the following types of houses do you live in?	Nominal	Input	22
QA01	18	When did you get your pet?	Nominal	Input	22
QA02	19	Do you have any other species of pets beside your pet dog?	Nominal	Input	22
QA03	20	How many dogs do you currently have? (also include cases of people living together (including parents) and owning a dog, only include when the dog is living in the house (including the yard), excluded when being raised for food or for breeding purposes)	Scale	Input	22
QA04	21	How old is your dog?	Scale	Input	22
QA05	22	How many years have you lived with your dog?	Scale	Input	22
QA06	23	Is your dog a pure breed or a cross breed?	Nominal	Input	22
QA061	24	What breed is your dog?	Nominal	Input	22
QA062	25	If your dog is a mixed breed, what breeds is it? (If you don’t know, please answer “unknown”)	Nominal	Input	42
QA07	26	What is the gender of your dog?	Nominal	Input	22
QA08	27	Did your dog were altered?	Nominal	Input	22
QA09	28	What does your dog weigh?	Scale	Input	22
QA10	29	How tall is your dog (length from the foot to the shoulder)?	Scale	Input	22
QA11	30	What is the size of your dog?	Nominal	Input	22
QA12	31	How often do you walk your dog?	Nominal	Input	22
QA13	32	(hour) How long do you spend walking with your dog?	Scale	Input	22
QA13z01	33	(minute) How long do you spend walking with your dog?	Scale	Input	22
QA14	34	On average, how many hours a day do you spend with your pet? *including walking	Scale	Input	22
QA15	35	How many times did you visit an animal hospital in the past year?	Scale	Input	22
QA16	36	If your dog visited a veterinary hospital due to illness in the past year, please mark all the reasons for visiting the hospital (none)	Scale	Input	22
QA16z01	37	If your dog visited a veterinary hospital due to illness in the past year, please mark all the reasons for visiting the hospital (Dentistry)	Scale	Input	22
QA16z02	38	If your dog visited a veterinary hospital due to illness in the past year, please mark all the reasons for visiting the hospital (Ophthalmology)	Scale	Input	22
QA16z03	39	If your dog visited a veterinary hospital due to illness in the past year, please mark all the reasons for visiting the hospital (Respiratory disease)	Scale	Input	22
QA16z04	40	If your dog visited a veterinary hospital due to illness in the past year, please mark all the reasons for visiting the hospital (Cardiology)	Scale	Input	22
QA16z05	41	If your dog visited a veterinary hospital due to illness in the past year, please mark all the reasons for visiting the hospital (Digestive disease)	Scale	Input	22
QA16z06	42	If your dog visited a veterinary hospital due to illness in the past year, please mark all the reasons for visiting the hospital (Orthopedic surgery )	Scale	Input	22
QA16z07	43	If your dog visited a veterinary hospital due to illness in the past year, please mark all the reasons for visiting the hospital (Cancer)	Scale	Input	22
QA16z08	44	If your dog visited a veterinary hospital due to illness in the past year, please mark all the reasons for visiting the hospital (Dermatology)	Scale	Input	22
QA16z09	45	If your dog visited a veterinary hospital due to illness in the past year, please mark all the reasons for visiting the hospital (Neurology)	Scale	Input	22
QA16z10	46	If your dog visited a veterinary hospital due to illness in the past year, please mark all the reasons for visiting the hospital (Heartworm)	Scale	Input	22
QA16z11	47	If your dog visited a veterinary hospital due to illness in the past year, please mark all the reasons for visiting the hospital (Vaccination)	Scale	Input	22
QA16z12	48	If your dog visited a veterinary hospital due to illness in the past year, please mark all the reasons for visiting the hospital (Emergency)	Scale	Input	22
QA16z13	49	If your dog visited a veterinary hospital due to illness in the past year, please mark all the reasons for visiting the hospital (Other)	Scale	Input	22
QA17	50	The Body Condition Score (BCS) chart is presented next. What is your dog’s BCS?	Scale	Input	22
QA18	51	How did you get your dog?	Nominal	Input	22
QB01	52	I really like seeing pets enjoy their food.	Scale	Input	22
QB02	53	My pet means more to me than any of my friends (or would if I had one).	Scale	Input	22
QB03	54	I would like to have a pet in my home.	Scale	Input	22
QB04	55	Having pets is a waste of money.	Scale	Input	22
QB05	56	House pets add happiness to my life (or would if I had one).	Scale	Input	22
QB06	57	I feel that pets should always be kept outside.	Scale	Input	22
QB07	58	I play with my pet every day (or would if I had one).	Scale	Input	22
QB08	59	I have occasionally communicated with my pet and understood what it was trying to express (or would if I had one).	Scale	Input	22
QB09	60	The world would be better place if people stopped spending so much time caring for their pets and started caring more for other human beings instead.	Scale	Input	22
QB10	61	I like to feed animals out of my hand.	Scale	Input	22
QB11	62	I love pets.	Scale	Input	22
QB12	63	Animals belong in the wild or in zoos, but not in the home.	Scale	Input	22
QB13	64	If you keep pets in the house you can expect a lot of damage to furniture.	Scale	Input	22
QB14	65	I like house pets.	Scale	Input	22
QB15	66	Pets are fun but it’s not worth the trouble of owning one.	Scale	Input	22
QB16	67	I frequently talk to my pets (or would if I had one).	Scale	Input	22
QB17	68	I hate animals.	Scale	Input	22
QB18	69	You should treat your house pets with as much respect as you would a human member of your family.	Scale	Input	22
Variables in the working file

## Sheet: Values
Variable Values
Value		Label
SQ01	1	Yes
	2	No
SQ02	1	Yes
	2	No
SQ03	1	Yes
	2	No
Q01	1	Male
	2	Female
Q021	1	1998
	2	1997
	3	1996
	4	1995
	5	1994
	6	1993
	7	1992
	8	1991
	9	1990
	10	1989
	11	1988
	12	1987
	13	1986
	16	1985
	15	1984
	16	1983
	17	1982
	18	1981
	19	1980
	20	1979
	21	1978
Q022	1	January
	2	Febuary
	3	March
	4	April
	5	May
	6	June
	7	July
	8	August
	9	September
	10	October
	11	November
	12	December
Q03	1	Yes
	2	No
Q031	1	You and your spouse are living together
	2	You have a spouse but you are not living together
	3	Your spouse has died
	4	You are divorced
Q04	1	Yes
	2	No
Q05	1	Very good
	2	Good
	3	Normal
	4	Bad
	5	Very bad
Q06	1	Korean traditional school
	2	Home schooling
	3	Elementary school
	4	Middle School
	5	High School
	6	Two-year college
	7	University
	8	Graduate school
Q07	1	Yes
	2	No
Q071	1	Employed
	2	Self-employed
	3	Help family
Q09	1	Annual
	2	Monthly
Q10	1	Detached
	2	Apartment
	3	Multifamily
	4	Studio apartment
QA01	1	Before I was 6 years old
	2	When I was between 6 and 12 years of age
	3	When I was between 13 and 18 years of age
	4	After I was 19 years of age
QA02	1	Yes
	2	No
QA06	1	Pure breed
	2	Cross breed
QA07	1	Male
	2	Female
QA08	1	Yes
	2	No
QA11	1	Miniature (< 2 kg)
	2	Small (2–10 kg)
	3	Medium (11–25 kg)
	4	Large (26–50 kg)
	5	Giant (> 50 kg)
QA12	1	More than once a day
	2	Once every two or three days
	3	Once every four to six days
	4	Less than once a week
	5	I never walk my dog
QA16	1	None
	2	Dentistry (e.g., Gingivitis, Plaque, Tartar)
	3	Ophthalmology (e.g., Glaucoma, Cataracts, Corneal ulcers)
	4	Respiratory disease (e.g., Pneumonia, Tracheal collapse)
	5	Cardiology (e.g., Patent Ductus Arteriosus, Arrhythmias)
	6	Digestive disease (e.g., Diarrhea, Colitis, Small intestinal malabsorption)
	7	Orthopedic surgery (e.g., Hip dysplasia, Fractures)
	8	Cancer (e.g., Lymphoma, Mast cell tumors, Hemanglosarcoma)
	9	Dermatology (e.g., Allergies, Ear diseases)
	10	Neurology (e.g., Myositis, Masthenia Gravis_
	11	Heartworm
	12	Vaccination
	13	Emergency
	14	Other
QA16z01	1	None
	2	Dentistry (e.g., Gingivitis, Plaque, Tartar)
	3	Ophthalmology (e.g., Glaucoma, Cataracts, Corneal ulcers)
	4	Respiratory disease (e.g., Pneumonia, Tracheal collapse)
	5	Cardiology (e.g., Patent Ductus Arteriosus, Arrhythmias)
	6	Digestive disease (e.g., Diarrhea, Colitis, Small intestinal malabsorption)
	7	Orthopedic surgery (e.g., Hip dysplasia, Fractures)
	8	Cancer (e.g., Lymphoma, Mast cell tumors, Hemanglosarcoma)
	9	Dermatology (e.g., Allergies, Ear diseases)
	10	Neurology (e.g., Myositis, Masthenia Gravis_
	11	Heartworm
	12	Vaccination
	13	Emergency
	14	Other
QA16z02	1	None
	2	Dentistry (e.g., Gingivitis, Plaque, Tartar)
	3	Ophthalmology (e.g., Glaucoma, Cataracts, Corneal ulcers)
	4	Respiratory disease (e.g., Pneumonia, Tracheal collapse)
	5	Cardiology (e.g., Patent Ductus Arteriosus, Arrhythmias)
	6	Digestive disease (e.g., Diarrhea, Colitis, Small intestinal malabsorption)
	7	Orthopedic surgery (e.g., Hip dysplasia, Fractures)
	8	Cancer (e.g., Lymphoma, Mast cell tumors, Hemanglosarcoma)
	9	Dermatology (e.g., Allergies, Ear diseases)
	10	Neurology (e.g., Myositis, Masthenia Gravis_
	11	Heartworm
	12	Vaccination
	13	Emergency
	14	Other
QA16z03	1	None
	2	Dentistry (e.g., Gingivitis, Plaque, Tartar)
	3	Ophthalmology (e.g., Glaucoma, Cataracts, Corneal ulcers)
	4	Respiratory disease (e.g., Pneumonia, Tracheal collapse)
	5	Cardiology (e.g., Patent Ductus Arteriosus, Arrhythmias)
	6	Digestive disease (e.g., Diarrhea, Colitis, Small intestinal malabsorption)
	7	Orthopedic surgery (e.g., Hip dysplasia, Fractures)
	8	Cancer (e.g., Lymphoma, Mast cell tumors, Hemanglosarcoma)
	9	Dermatology (e.g., Allergies, Ear diseases)
	10	Neurology (e.g., Myositis, Masthenia Gravis_
	11	Heartworm
	12	Vaccination
	13	Emergency
	14	Other
QA16z04	1	None
	2	Dentistry (e.g., Gingivitis, Plaque, Tartar)
	3	Ophthalmology (e.g., Glaucoma, Cataracts, Corneal ulcers)
	4	Respiratory disease (e.g., Pneumonia, Tracheal collapse)
	5	Cardiology (e.g., Patent Ductus Arteriosus, Arrhythmias)
	6	Digestive disease (e.g., Diarrhea, Colitis, Small intestinal malabsorption)
	7	Orthopedic surgery (e.g., Hip dysplasia, Fractures)
	8	Cancer (e.g., Lymphoma, Mast cell tumors, Hemanglosarcoma)
	9	Dermatology (e.g., Allergies, Ear diseases)
	10	Neurology (e.g., Myositis, Masthenia Gravis_
	11	Heartworm
	12	Vaccination
	13	Emergency
	14	Other
QA16z05	1	None
	2	Dentistry (e.g., Gingivitis, Plaque, Tartar)
	3	Ophthalmology (e.g., Glaucoma, Cataracts, Corneal ulcers)
	4	Respiratory disease (e.g., Pneumonia, Tracheal collapse)
	5	Cardiology (e.g., Patent Ductus Arteriosus, Arrhythmias)
	6	Digestive disease (e.g., Diarrhea, Colitis, Small intestinal malabsorption)
	7	Orthopedic surgery (e.g., Hip dysplasia, Fractures)
	8	Cancer (e.g., Lymphoma, Mast cell tumors, Hemanglosarcoma)
	9	Dermatology (e.g., Allergies, Ear diseases)
	10	Neurology (e.g., Myositis, Masthenia Gravis_
	11	Heartworm
	12	Vaccination
	13	Emergency
	14	Other
QA16z06	1	None
	2	Dentistry (e.g., Gingivitis, Plaque, Tartar)
	3	Ophthalmology (e.g., Glaucoma, Cataracts, Corneal ulcers)
	4	Respiratory disease (e.g., Pneumonia, Tracheal collapse)
	5	Cardiology (e.g., Patent Ductus Arteriosus, Arrhythmias)
	6	Digestive disease (e.g., Diarrhea, Colitis, Small intestinal malabsorption)
	7	Orthopedic surgery (e.g., Hip dysplasia, Fractures)
	8	Cancer (e.g., Lymphoma, Mast cell tumors, Hemanglosarcoma)
	9	Dermatology (e.g., Allergies, Ear diseases)
	10	Neurology (e.g., Myositis, Masthenia Gravis_
	11	Heartworm
	12	Vaccination
	13	Emergency
	14	Other
QA16z07	1	None
	2	Dentistry (e.g., Gingivitis, Plaque, Tartar)
	3	Ophthalmology (e.g., Glaucoma, Cataracts, Corneal ulcers)
	4	Respiratory disease (e.g., Pneumonia, Tracheal collapse)
	5	Cardiology (e.g., Patent Ductus Arteriosus, Arrhythmias)
	6	Digestive disease (e.g., Diarrhea, Colitis, Small intestinal malabsorption)
	7	Orthopedic surgery (e.g., Hip dysplasia, Fractures)
	8	Cancer (e.g., Lymphoma, Mast cell tumors, Hemanglosarcoma)
	9	Dermatology (e.g., Allergies, Ear diseases)
	10	Neurology (e.g., Myositis, Masthenia Gravis_
	11	Heartworm
	12	Vaccination
	13	Emergency
	14	Other
QA16z08	1	None
	2	Dentistry (e.g., Gingivitis, Plaque, Tartar)
	3	Ophthalmology (e.g., Glaucoma, Cataracts, Corneal ulcers)
	4	Respiratory disease (e.g., Pneumonia, Tracheal collapse)
	5	Cardiology (e.g., Patent Ductus Arteriosus, Arrhythmias)
	6	Digestive disease (e.g., Diarrhea, Colitis, Small intestinal malabsorption)
	7	Orthopedic surgery (e.g., Hip dysplasia, Fractures)
	8	Cancer (e.g., Lymphoma, Mast cell tumors, Hemanglosarcoma)
	9	Dermatology (e.g., Allergies, Ear diseases)
	10	Neurology (e.g., Myositis, Masthenia Gravis_
	11	Heartworm
	12	Vaccination
	13	Emergency
	14	Other
QA16z09	1	None
	2	Dentistry (e.g., Gingivitis, Plaque, Tartar)
	3	Ophthalmology (e.g., Glaucoma, Cataracts, Corneal ulcers)
	4	Respiratory disease (e.g., Pneumonia, Tracheal collapse)
	5	Cardiology (e.g., Patent Ductus Arteriosus, Arrhythmias)
	6	Digestive disease (e.g., Diarrhea, Colitis, Small intestinal malabsorption)
	7	Orthopedic surgery (e.g., Hip dysplasia, Fractures)
	8	Cancer (e.g., Lymphoma, Mast cell tumors, Hemanglosarcoma)
	9	Dermatology (e.g., Allergies, Ear diseases)
	10	Neurology (e.g., Myositis, Masthenia Gravis_
	11	Heartworm
	12	Vaccination
	13	Emergency
	14	Other
QA16z10	1	None
	2	Dentistry (e.g., Gingivitis, Plaque, Tartar)
	3	Ophthalmology (e.g., Glaucoma, Cataracts, Corneal ulcers)
	4	Respiratory disease (e.g., Pneumonia, Tracheal collapse)
	5	Cardiology (e.g., Patent Ductus Arteriosus, Arrhythmias)
	6	Digestive disease (e.g., Diarrhea, Colitis, Small intestinal malabsorption)
	7	Orthopedic surgery (e.g., Hip dysplasia, Fractures)
	8	Cancer (e.g., Lymphoma, Mast cell tumors, Hemanglosarcoma)
	9	Dermatology (e.g., Allergies, Ear diseases)
	10	Neurology (e.g., Myositis, Masthenia Gravis_
	11	Heartworm
	12	Vaccination
	13	Emergency
	14	Other
QA16z11	1	None
	2	Dentistry (e.g., Gingivitis, Plaque, Tartar)
	3	Ophthalmology (e.g., Glaucoma, Cataracts, Corneal ulcers)
	4	Respiratory disease (e.g., Pneumonia, Tracheal collapse)
	5	Cardiology (e.g., Patent Ductus Arteriosus, Arrhythmias)
	6	Digestive disease (e.g., Diarrhea, Colitis, Small intestinal malabsorption)
	7	Orthopedic surgery (e.g., Hip dysplasia, Fractures)
	8	Cancer (e.g., Lymphoma, Mast cell tumors, Hemanglosarcoma)
	9	Dermatology (e.g., Allergies, Ear diseases)
	10	Neurology (e.g., Myositis, Masthenia Gravis_
	11	Heartworm
	12	Vaccination
	13	Emergency
	14	Other
QA16z12	1	None
	2	Dentistry (e.g., Gingivitis, Plaque, Tartar)
	3	Ophthalmology (e.g., Glaucoma, Cataracts, Corneal ulcers)
	4	Respiratory disease (e.g., Pneumonia, Tracheal collapse)
	5	Cardiology (e.g., Patent Ductus Arteriosus, Arrhythmias)
	6	Digestive disease (e.g., Diarrhea, Colitis, Small intestinal malabsorption)
	7	Orthopedic surgery (e.g., Hip dysplasia, Fractures)
	8	Cancer (e.g., Lymphoma, Mast cell tumors, Hemanglosarcoma)
	9	Dermatology (e.g., Allergies, Ear diseases)
	10	Neurology (e.g., Myositis, Masthenia Gravis_
	11	Heartworm
	12	Vaccination
	13	Emergency
	14	Other
QA16z13	1	None
	2	Dentistry (e.g., Gingivitis, Plaque, Tartar)
	3	Ophthalmology (e.g., Glaucoma, Cataracts, Corneal ulcers)
	4	Respiratory disease (e.g., Pneumonia, Tracheal collapse)
	5	Cardiology (e.g., Patent Ductus Arteriosus, Arrhythmias)
	6	Digestive disease (e.g., Diarrhea, Colitis, Small intestinal malabsorption)
	7	Orthopedic surgery (e.g., Hip dysplasia, Fractures)
	8	Cancer (e.g., Lymphoma, Mast cell tumors, Hemanglosarcoma)
	9	Dermatology (e.g., Allergies, Ear diseases)
	10	Neurology (e.g., Myositis, Masthenia Gravis_
	11	Heartworm
	12	Vaccination
	13	Emergency
	14	Other
QA17	1	Too thin
	2	②
	3	③
	4	④
	5	⑤
	6	⑥
	7	⑦
	8	⑧
	9	Too heavy
QA18	1	Adopted from a shelter
	2	Strayed in
	3	Pet shop
	4	Breeder
	5	Friend or gifted
	6	Born in the house
	7	Veterinary Surgeon
	8	Internet
	9	Other
QB01	1	Strongly disagree
	2	Moderately disagree
	3	Disagree
	4	Unsure
	5	Slightly agree
	6	Moderately agree
	7	Strongly agree
QB02	1	Strongly disagree
	2	Moderately disagree
	3	Disagree
	4	Unsure
	5	Slightly agree
	6	Moderately agree
	7	Strongly agree
QB03	1	Strongly disagree
	2	Moderately disagree
	3	Disagree
	4	Unsure
	5	Slightly agree
	6	Moderately agree
	7	Strongly agree
QB04	1	Strongly disagree
	2	Moderately disagree
	3	Disagree
	4	Unsure
	5	Slightly agree
	6	Moderately agree
	7	Strongly agree
QB05	1	Strongly disagree
	2	Moderately disagree
	3	Disagree
	4	Unsure
	5	Slightly agree
	6	Moderately agree
	7	Strongly agree
QB06	1	Strongly disagree
	2	Moderately disagree
	3	Disagree
	4	Unsure
	5	Slightly agree
	6	Moderately agree
	7	Strongly agree
QB07	1	Strongly disagree
	2	Moderately disagree
	3	Disagree
	4	Unsure
	5	Slightly agree
	6	Moderately agree
	7	Strongly agree
QB08	1	Strongly disagree
	2	Moderately disagree
	3	Disagree
	4	Unsure
	5	Slightly agree
	6	Moderately agree
	7	Strongly agree
QB09	1	Strongly disagree
	2	Moderately disagree
	3	Disagree
	4	Unsure
	5	Slightly agree
	6	Moderately agree
	7	Strongly agree
QB10	1	Strongly disagree
	2	Moderately disagree
	3	Disagree
	4	Unsure
	5	Slightly agree
	6	Moderately agree
	7	Strongly agree
QB11	1	Strongly disagree
	2	Moderately disagree
	3	Disagree
	4	Unsure
	5	Slightly agree
	6	Moderately agree
	7	Strongly agree
QB12	1	Strongly disagree
	2	Moderately disagree
	3	Disagree
	4	Unsure
	5	Slightly agree
	6	Moderately agree
	7	Strongly agree
QB13	1	Strongly disagree
	2	Moderately disagree
	3	Disagree
	4	Unsure
	5	Slightly agree
	6	Moderately agree
	7	Strongly agree
QB14	1	Strongly disagree
	2	Moderately disagree
	3	Disagree
	4	Unsure
	5	Slightly agree
	6	Moderately agree
	7	Strongly agree
QB15	1	Strongly disagree
	2	Moderately disagree
	3	Disagree
	4	Unsure
	5	Slightly agree
	6	Moderately agree
	7	Strongly agree
QB16	1	Strongly disagree
	2	Moderately disagree
	3	Disagree
	4	Unsure
	5	Slightly agree
	6	Moderately agree
	7	Strongly agree
QB17	1	Strongly disagree
	2	Moderately disagree
	3	Disagree
	4	Unsure
	5	Slightly agree
	6	Moderately agree
	7	Strongly agree
QB18	1	Strongly disagree
	2	Moderately disagree
	3	Disagree
	4	Unsure
	5	Slightly agree
	6	Moderately agree
	7	Strongly agree

## Sheet: Data set
Number	SQ01	SQ02	SQ03	Q01	Q021	Q022	Q03	Q031	Q04	Q05	Q06	Q07	Q071	Q08	Q09	Q09t	Q10	QA01	QA02	QA03	QA04	QA05	QA06	QA061	QA062	QA07	QA08	QA09	QA10	QA11	QA12	QA13	QA13z01	QA14	QA15	QA16	QA16z01	QA16z02	QA16z03	QA16z04	QA16z05	QA16z06	QA16z07	QA16z08	QA16z09	QA16z10	QA16z11	QA16z12	QA16z13
1	1	1	1	1	15	2	2		2	3	7	1	3	3	2	50	2	4	2	1			1	Cocker spaniel		1	2	10	20	3	5	2	0	1	2	1
2	1	1	2	1	20	11	1	1	1	3	7	1	1	3	1	4200	3
3	1	1	1	2	7	5	2		2	2	8	1	1	0	1	3600	2	1	1	2	2	2	1	Maltese		2	1	6	80	2	1	1	0	2	2	1
4	1	1	1	1	20	10	1	1	1	2	7	1	1	3	2	500	3	3	1	2	4	4	1	Chihuahua		2	2	4	5	2	2	1	0	3	4		2		4		6			9		11
5	1	1	2	2	9	11	2		2	3	6	2		4	1	7000	1
6	1	1	2	1	9	5	2		2	3	7	1	1	0	1	5500	3
7	1	1	1	2	13	5	1	1	2	4	7	1	1	1	1	9600	3	4	2	1			2		Unknown	1	2	2	20	2	2	1	5	14	50			3		5
8	1	1	2	1	20	12	2		2	3	7	1	1	1	2	300	3
9	1	1	1	2	18	9	1	1	1	3	8	1	3	2	2	680	2	4	2	1			2		Unknown	1	1	9	44	2	1	1	0	7	3		2										12
10	1	1	1	1	21	8	1	1	1	2	7	1	1	4	2	650	2	4	1	1			1	Poodle		2	2	2	28	2	1	1	0	2	7		2				6
11	1	1	1	1	19	9	1	1	1	2	5	1	1	6	2	680	3	2	2	1			2		Unknown	2	2	5	55	2	1	4	30	7	1									9		11	12
12	1	1	1	1	21	3	1	1	1	3	7	2		3	1	9500	2	4	1	1			1	Pomeranian		1	2	2.5	18	3	1	1	10	3	3			3			6						12
13	1	1	2	2	19	4	1	1	2	3	7	2		1	2	470	3
14	1	1	2	2	15	2	2		2	3	8	1	1	1	2	200	3
15	1	1	1	2	11	10	2		2	2	8	1	1	5	2	400	2	4	2	1			1	Pomeranian		1	1	4	28	2	2	2	0	3	3	1
16	1	1	1	1	21	12	1	1	1	3	7	1	1	3	1	5000	2	4	2	1			2	Chihuahua		1	2	10	30	2	2	0	50	3	2				4		6
17	1	1	2	1	9	11	2		2	2	7	1	1	4	1	1500	2
18	1	1	2	1	6	6	2		2	3	7	1	2	3	2	6	2
19	1	1	1	1	10	6	2		2	2	7	1	1	4	2	600	2	3	2	1			1	Poodle		1	1	4	15	2	2	1	0	4	0
20	1	1	2	1	14	9	2		2	4	6	1	1	0	2	350	2
21	1	1	1	1	13	3	2		2	2	7	1	1	1	2	350	3	2	2	1			1	Pomeranian		2	1	3	20	2	2	0	40	9	10											11	12
22	1	1	1	2	19	1	1	1	2	2	7	2		1	2	250	3	1	1	1			2		Unknown	1	1	7	40	2	2	1	0	12	0
23	1	1	1	2	18	10	1	1	1	3	7	2		3	2	460	2	1	2	1			1	Shih Tzu		1	1	5	50	2	1	0	30	5	3		2
24	1	1	2	1	11	3	2		2	1	7	1	1	4	1	1000	2
25	1	1	2	2	18	10	1	1	2	2	7	1	1	1	2	520	2
26	1	1	1	2	18	8	2		2	3	6	1	2	3	1	3000	3	4	2	1			2	Cocker spaniel		1	1	19	30	3	1	1	0	7	3					5					10			13
27	1	1	2	2	18	6	2		2	3	7	1	1	3	1	7000	2
28	1	1	1	1	17	10	1	1	2	2	7	1	1	2	1	9000	2	4	2	1			1	Pomeranian		1	2	2.1	16	1	2	1	20	3	3							7					12	13
29	1	1	1	1	17	11	2		2	2	7	1	1	1	2	500	2	1	2	1			1	Chihuahua		2	1	2	17	2	2	1	30	2	2												12
30	1	1	2	2	19	12	1	1	1	2	7	2		3	2	500	2
31	1	1	2	1	8	1	2		2	2	7	1	1	4	2	800	2
32	1	1	1	1	20	10	2		2	2	7	1	1	2	2	300	3	4	2	1			1	Maltese		2	2	5	50	2	1	1	30	4	5			3						9			12
33	1	1	1	1	12	1	1	1	1	2	7	1	1	5	2	650	2	4	2	1			1	Pomeranian		1	1	5	60	2	2	1	0	1	6		2							9
34	1	1	1	2	18	5	2		2	2	7	1	1	3	1	7500	2	4	2	1			1	Shih Tzu		1	2	6	25	2	2	1	30	2	3									9
35	1	1	2	2	7	12	2		2	3	7	2		3	2	450	2
36	1	1	2	1	20	3	2		2	3	7	1	1	1	2	300	2
37	1	1	1	1	5	4	2		2	2	6	1	2	4	2	500	2	4	2	1			1	Dalmatian		1	1	10	10	2	2	1	20	2	1	1
38	1	1	2	2	5	8	2		2	2	7	2		3	2	1000	2
39	1	1	2	2	6	8	2		2	3	7	1	1	4	2	500	3
40	1	1	2	1	19	8	1	1	1	3	7	1	1	2	2	300	2
41	1	1	1	1	10	1	1	1	1	1	7	1	1	3	1	5000	1	3	1	2	1	1	1	Persian Cat		1	1	2	40	2	1	1	0	1	1				4			7
42	1	1	2	2	21	11	1	1	2	3	7	2		1	2	300	3
43	1	1	2	2	16	4	2		2	3	6	1	1	3	1	2500	3
44	1	1	1	1	17	1	2		2	2	7	1	1	3	2	500	3	2	2	1			1	Shih Tzu		2	2	5	5	2	2	1	30	12	3			3									12
45	1	1	1	2	16	10	1	1	1	3	7	1	1	4	2	480	2	4	2	1			2		Unknown	2	2	3	50	2	2	0	50	2	2		2		4	5			8	9	10
46	1	1	2	1	5	5	2		2	4	6	1	3	2	2	250	3
47	1	1	1	2	18	3	1	1	1	2	7	1	1	3	2	800	2	2	2	1			1	Chihuahua		1	1	3	60	2	2	1	20	5	3		2
48	1	1	2	2	8	10	2		2	3	7	1	1	3	2	150	2
49	1	1	1	1	18	7	2		2	4	7	1	1	2	1	8000	3	4	2	1			1	Yorkshire Terrier		2	1	4	26	2	2	1	0	1	6						6
50	1	1	2	1	17	7	2		2	3	5	1	1	2	2	300	3
51	1	1	2	2	13	2	2		2	3	7	1	1	0	1	3700	3
52	1	1	1	1	16	8	1	1	1	2	7	1	1	5	1	8400	2	3	1	4	3	3	1	Cocker spaniel		2	2	13	20	3	2	2	30	12	11		2	3			6			9		11	12
53	1	1	1	1	10	5	2		2	2	7	1	1	4	2	700	2	3	1	2	4	4	1	Poodle		1	1	4	25	3	2	1	0	3	10		2	3							10
54	1	1	1	1	5	2	2		2	2	7	1	1	2	2	370	3	4	2	1			2		Unknown	1	2	5	15	2	4	1	1	2	1	1
55	1	1	2	2	9	6	2		2	2	7	2		2	2	650	3
56	1	1	2	2	15	6	2		2	3	7	1	1	2	2	400	2
57	1	1	2	2	9	11	2		2	3	7	1	1	3	2	1000	3
58	1	1	1	1	14	3	2		2	3	7	1	1	1	1	3000	3	4	2	1			2		Unknown	1	1	5	60	2	2	0	30	3	0
59	1	1	2	2	19	11	1	1	1	2	7	1	2	3	2	600	2
60	1	1	2	2	19	9	1	1	1	3	7	2		2	2	480	3
61	1	1	2	1	5	9	2		2	1	6	2		1	1	1900	2
62	1	1	2	2	7	6	2		2	2	7	2		3	2	800	2
63	1	1	2	2	15	12	2		2	3	7	2		2	2	700	2
64	1	1	2	1	7	4	2		2	2	6	1	1	4	2	20	2
65	1	1	2	2	19	11	1	1	1	2	6	1	1	3	1	8000	2
66	1	1	1	1	13	10	2		2	2	7	1	1	4	2	700	2	3	1	2	5	5	1	Maltese		1	1	2	20	3	2	1	0	4	5		2	3	4
67	1	1	1	2	15	2	2		2	3	7	1	1	2	1	9000	3	4	2	1			1	Golden Retreiver		1	2	12	100	3	2	1	0	1	3											11	12
68	1	1	1	1	11	10	2		2	1	7	1	1	3	1	500	1	3	2	1			2		Unknown	2	2	6	60	2	5	1	0	1	0
69	1	1	1	2	21	8	1	1	1	3	5	1	1	3	2	200	2	4	2	1			1	Chihuahua		2	1	5	10	2	1	0	30	1	5	1
70	1	1	1	1	6	10	2		2	3	7	1	1	4	2	300	2	3	2	1			1	Maltese		1	1	7	35	2	2	1	0	1	5		2	3
71	1	1	2	2	11	1	2		2	3	7	2		0	1	3000	4
72	1	1	1	2	21	10	1	1	1	3	7	1	1	2	2	850	2	3	2	1			2		Unknown	1	1	8	65	2	4	1	0	3	6														14
73	1	1	1	2	6	10	2		2	1	7	1	1	4	2	200	2	3	1	2	5	5	2	Pomeranian		2	2	9	40	3	2	1	0	10	12	1
74	1	1	2	2	13	6	2		2	4	6	2		3	1	4000	3
75	1	1	1	1	15	4	2		2	3	6	1	1	50	2	200	3	4	2	1			1	Siberian Husky		2	2	5	90	3	2	0	30	1	2	1
76	1	1	1	1	11	2	2		2	2	7	1	2	0	1	4800	3	3	2	1			1	Maltese		1	2	6	25	2	3	1	10	6	1	1
77	1	1	2	1	19	10	1	1	1	2	6	1	1	3	1	8000	2
78	1	1	1	2	20	11	1	1	1	2	6	1	1	3	2	670	2	3	1	2	2	2	1	Dachshund		2	2	7	20	2	2	1	10	12	2			3			6			9
79	1	1	1	1	15	8	2		2	2	7	1	1	3	1	6000	3	2	2	1			1	Poodle		1	1	8	40	2	2	2	0	14	5						6				10
80	1	1	1	1	10	2	2		2	2	7	1	1	4	2	500	1	4	2	1			1	Shiba		1	2	21	33	3	2	1	5	2	2				4
81	1	1	1	2	14	7	2		2	3	7	1	1	4	2	800	2	4	2	1			1	Shih Tzu		1	1	3	20	2	4	1	20	2	0
82	1	1	2	2	6	8	2		2	4	6	1	1	3	2	600	1
83	1	1	1	2	11	10	2		2	2	7	1	1	2	2	600	1	3	2	1			1	Pomeranian		2	2	2	16	2	2	0	30	6	20						6						12
84	1	1	1	2	9	9	2		2	2	7	1	2	2	2	250	3	3	2	1			1	Welsh Corgi		2	1	8	60	2	2	1	10	10	5	1
85	1	1	2	1	8	11	2		2	2	7	1	1	2	2	560	4
86	1	1	1	1	13	5	1	1	2	2	7	1	1	2	1	7800	2	2	1	1			1	Maltese		2	1	3.5	45	2	3	0	40	2	5		2	3						9
87	1	1	2	1	11	5	2		2	3	7	2		3	2	900	1
88	1	1	1	1	18	9	1	1	2	2	7	1	1	2	2	700	2	4	1	1			1	Cocker spaniel		2	1	8	70	2	3	1	0	2	12		2
89	1	1	2	2	19	10	1	1	2	3	7	2		2	2	420	2
90	1	1	1	1	11	9	2		2	2	7	1	1	3	2	750	3	4	2	1			2		Unknown	2	1	6	62	2	2	1	30	6	3	1
91	1	1	1	2	16	2	2		2	3	7	1	1	1	1	32000	3	4	2	1			1	Pomeranian		2	2	10	50	2	1	1	0	7	0
92	1	1	1	2	20	4	1	1	1	3	7	1	1	3	2	600	2	4	2	1			1	Maltese		2	1	3.5	35	2	1	1	30	3	20							7						13
93	1	1	2	2	7	7	2		2	2	7	1	1	3	2	800	3
94	1	1	1	1	9	8	1	1	2	3	7	1	1	4	2	250	2	3	1	1			1	spitz		1	2	11	54	3	2	1	11	2	2	1
95	1	1	2	1	19	2	2		2	4	7	2		0	1	0	3
96	1	1	1	1	18	5	1	1	2	2	8	1	1	1	1	15000	3	4	2	1			1	Pomeranian		1	1	3	30	2	4	1	0	2	5											11
97	1	1	1	2	3	10	2		2	2	7	2		3	2	500	3	4	2	1			2		Unknown	2	1	3.7	22	2	2	2	0	6	0
98	1	1	2	2	7	3	2		2	3	7	2		2	2	250	2
99	1	1	2	1	21	8	2		2	3	7	1	2	1	2	500	2
100	1	1	2	1	11	7	2		2	3	6	1	1	4	2	900	2
101	1	1	2	2	5	11	2		2	3	7	1	1	3	2	240	2
102	1	1	2	1	11	12	2		2	2	7	1	1	4	1	10000	2
103	1	1	2	2	13	1	2		2	3	7	2		0	2	30	4
104	1	1	1	2	18	11	1	1	1	3	5	1	1	3	2	470	3	2	1	1			1	Poodle		2	2	5	30	2	4	1	0	1	0
105	1	1	2	2	7	11	2		2	2	7	1	2	3	1	2000	2
106	1	1	2	2	20	10	2		1	2	7	2		2	2	500	1
107	1	1	1	2	21	3	1	1	1	1	7	1	1	2	2	760	2	1	2	1			1	Chihuahua		1	2	3	50	2	2	1	10	3	3						6			9
108	1	1	2	1	16	7	2		2	3	5	1	1	1	2	400	3
109	1	1	2	2	18	8	1	1	1	1	6	1	1	4	1	15000	2
110	1	1	2	2	19	11	2		2	3	8	1	1	0	2	380	3
111	1	1	2	2	12	5	2		2	2	7	1	1	0	1	3000	3
112	1	1	2	2	17	10	2		2	3	7	1	1	5	2	950	2
113	1	1	1	1	4	4	2		2	4	8	2		4	2	30	2	4	2	1			1	Miniature Pinscher		2	1	5	50	1	2	1	0	3	12		2		4			7
114	1	1	2	2	12	9	2		2	3	7	2		0	2	0	4
115	1	1	2	2	20	10	2		2	2	6	1	1	3	2	200	2
116	1	1	1	1	5	10	2		2	2	7	1	1	4	2	600	2	2	1	2	3	2	1	Poodle		1	2	8	60	2	4	1	0	2	2		2		4
117	1	1	2	1	10	3	2		2	3	5	2		3	2	350	2
118	1	1	2	1	17	7	2		2	3	8	1	1	0	2	160	3
119	1	1	2	2	19	6	1	1	1	3	6	2		5	2	350	2
120	1	1	1	2	11	6	1	1	2	3	7	1	1	2	1	8000	2	4	1	2	3	1	1	Shih Tzu		2	2	10	20	2	3	0	20	1	2									9
121	1	1	1	2	9	11	2		2	3	7	1	1	1	1	4800	2	3	2	1			1	Jindo		1	2	4	50	2	5	0	30	1	1	1
122	1	1	2	2	19	2	2		2	3	7	1	1	2	1	9000	3
123	1	1	1	1	20	9	1	1	1	3	8	1	1	2	1	5000	2	4	2	1			1	Pomeranian		1	1	5	30	2	4	0	50	3	0
124	1	1	1	2	4	8	2		2	3	7	1	1	5	2	500	2	3	1	1			1	Yorkshire Terrier		2	2	6	15	2	2	1	30	9	10		2							9		11	12
125	1	1	1	1	9	5	2		2	2	7	1	1	2	2	250	2	4	2	1			1	Miniature Poodle		1	2	4	35	2	3	0	15	9	2										10
126	1	1	1	2	20	11	1	1	1	2	7	1	1	2	2	500	2	4	2	1			1	Siberian Husky		1	1	20	170	3	1	1	0	5	6	1
127	1	1	1	2	21	9	1	1	1	2	7	1	2	3	1	600	3	3	2	1			1	Yorkshire Terrier		2	1	3	40	2	2	1	0	1	5		2	3								11	12
128	1	1	2	2	12	2	2		2	3	7	1	1	4	1	3600	3
129	1	1	1	2	16	3	2		2	3	8	1	1	2	2	850	1	1	1	1			1	Welsh Corgi		1	1	13	60	3	2	0	40	3	4											11	12
130	1	1	2	1	4	4	2		2	1	6	2		3	1	6000	3
131	1	1	1	2	18	12	2		2	2	7	1	1	1	2	200	3	4	1	1			1		Unknown	2	2	4	33	2	3	1	1	2	2		2			5
132	1	1	2	1	21	11	2		2	2	7	1	1	1	2	60	4
133	1	1	2	2	12	3	1	1	2	3	7	1	2	1	1	8000	2
134	1	1	1	1	19	7	2		2	2	7	1	2	4	1	5000	3	3	1	2	9	6	1	Dachshund		2	2	5	40	2	1	0	40	2	5		2							9			12
135	1	1	2	1	18	8	1	3	2	3	7	1	1	3	1	7000	2
136	1	1	2	2	8	1	2		2	1	8	1	1	0.2	2	300	3
137	1	1	2	2	10	5	2		2	4	8	1	1	2	2	600	1
138	1	1	2	1	17	8	2		2	2	8	1	1	2	1	6000	4
139	1	1	1	2	15	8	2		2	4	8	1	1	2	1	10000	4	4	2	1			1	Shih Tzu		1	1	4	25	2	4	0	30	5	5											11	12		14
140	1	1	2	2	18	3	2		2	2	7	1	1	0	2	250	1
141	1	1	2	2	13	5	2		2	3	7	1	1	0	1	1800	4
142	1	1	1	1	19	8	1	1	1	2	6	2		4	2	450	4	1	1	1			1	Maltese		2	2	3	40	2	1	0	30	2	0
143	1	1	2	2	15	11	1	1	1	3	7	2		3	1	7300	2
144	1	1	2	1	16	7	2		2	3	5	1	1	0	2	250	4
145	1	1	1	2	9	4	2		2	4	6	1	3	4	2	200	3	2	1	3	54	4	1	Cat		2	1	3.4	5	2	2	1	30	12	3		2					7	8				12
146	1	1	1	2	9	8	2		2	2	7	1	1	3	2	500	2	4	2	1			1	Poodle		2	1	6	50	2	1	1	0	1	10	1
147	1	1	2	2	11	3	2		2	3	7	1	1	1	2	160	4
148	1	1	1	2	15	1	2		2	3	7	1	1	2	1	5000	4	4	2	2	4	4	1	Shih Tzu		2	1	4	45	2	4	0	30	12	12						6					11	12
149	1	1	2	2	11	2	2		2	3	7	1	1	0	2	300	3
150	1	1	2	1	19	12	1	1	1	2	6	1	1	3	2	350	3
151	1	1	1	1	19	5	1	1	1	2	8	1	1	4	1	9500	2	4	2	1			1	Shih Tzu		2	2	10	50	2	1	0	30	5	2											11	12
152	1	1	1	2	16	12	1	1	1	1	7	1	1	3	2	350	2	4	1	1			1	Dalmatian		2	1	10	100	4	1	1	30	3	10	1
153	1	1	1	1	9	2	2		2	1	6	1	1	3	2	500	1	4	1	2	2	1	1	Cocker spaniel		1	1	1.5	50	3	1	1	2	1	2	1
154	1	1	2	2	9	4	2		2	2	7	1	1	5	2	1500	1
155	1	1	1	1	14	5	2		2	1	6	1	1	3	1	4500	3	4	2	1			1	Maltese		2	2	2	22	2	4	0	30	4	0
156	1	1	2	2	13	4	2		2	2	8	1	1	2	2	500	2
157	1	1	1	1	20	2	1	1	2	1	7	1	1	1	2	1000	2	4	2	1			1	Maltese		1	1	5	18	2	2	0	30	3	4				4
158	1	1	1	1	19	10	1	1	1	2	7	1	1	3	1	5000	2	2	1	1			1	Yorkshire Terrier		1	1	10	15	2	1	1	0	1	1		2
159	1	1	2	2	14	6	2		2	4	7	1	1	1	2	130	3
160	1	1	1	1	11	3	1	1	2	2	7	1	1	1	2	250	3	2	2	1			1	Bichon Frise		1	2	5	70	2	2	1	0	8	4	1
161	1	1	2	2	6	1	2		2	3	7	1	1	4	1	5000	2
162	1	1	1	2	13	11	1	1	1	2	7	1	1	3	1	5600	2	3	1	2	6	4	1	Pomeranian		1	1	8	30	3	3	2	0	3	6		2	3	4			7	8	9
163	1	1	1	2	21	8	2		2	2	7	1	1	1	2	120	2	4	2	1			1	Shih Tzu		2	2	3	52	2	2	1	2	2	3		2
164	1	1	1	1	15	7	1	1	1	2	8	1	1	5	1	7000	3	4	1	3	2	3	1	Chihuahua		1	1	3	7	2	4	5	2	6	2					5
165	1	1	1	2	4	6	2		2	4	7	1	1	2	2	100	2	2	2	1			2	Poodle		2	1	5	40	2	4	0	20	2	20		2							9					14
166	1	1	1	2	11	11	1	1	2	2	7	1	1	1	2	500	2	3	2	1			1	Standard poodle		2	1	20	130	3	3	1	0	10	2				4
167	1	1	2	1	9	3	2		2	3	7	1	1	4	2	80	2
168	1	1	2	1	9	1	2		2	3	7	1	1	3	1	11000	2
169	1	1	2	2	3	3	2		2	2	7	1	1	3	2	400	2
170	1	1	2	2	16	9	1	1	1	3	7	2		2	2	500	2
171	1	1	2	2	15	1	2		2	3	7	1	1	1	2	300	3
172	1	1	2	1	20	7	1	1	1	2	7	1	1	3	2	400	2
173	1	1	1	1	19	4	1	1	1	2	6	1	1	2	2	600	2	4	2	1			1	Maltese		2	1	3.5	15	2	3	1	0	3	6	1
174	1	1	2	1	20	9	1	1	1	2	8	1	1	2	2	600	2
175	1	1	1	1	2	9	2		2	2	5	1	1	4	1	7000	2	3	2	1			2		Unknown	2	2	3	8	1	3	1	0	6	5		2									11	12	13
176	1	1	2	2	11	8	2		2	3	7	1	1	0	1	2800	3
177	1	1	1	2	15	4	2		2	3	7	2		3	2	760	3	4	2	2	10	10	2	Mixed		1	1	5	20	2	4	0	20	5	10					5				9	10				14
178	1	1	2	2	19	2	2		2	2	7	1	1	0	1	4700	1
179	1	1	1	2	18	9	2		2	2	7	1	1	3	2	700	2	4	2	1			2	Maltese		1	1	4.5	25	2	1	1	0	12	20			3				7		9		11	12
180	1	1	2	2	17	8	1	1	1	3	7	1	1	2	2	750	2
181	1	1	1	2	7	9	2		2	2	7	1	1	5	2	350	1	4	1	2	5	4	2		Unknown	2	2	15	110	1	2	3	30	7	1		2
182	1	1	2	2	19	7	1	1	1	3	8	1	1	2	1	11000	2
183	1	1	2	2	14	9	2		2	3	7	1	1	1	1	7000	3
184	1	1	2	2	13	11	2		2	3	6	2		3	2	390	2
185	1	1	2	2	7	10	2		2	2	7	2		0	2	200	4
186	1	1	1	2	10	4	2		2	3	7	1	1	1	1	3400	4	4	2	1			1	Toy Poodle		1	1	5.2	45	2	1	0	30	2	2		2										12
187	1	1	2	2	5	9	2		2	2	6	1	1	1	2	299	3
188	1	1	2	2	14	7	1	1	1	2	6	1	1	3	2	250	3
189	1	1	2	1	19	3	2		2	2	6	2		0	1	4200	3
190	1	1	2	2	5	3	2		2	4	7	2		3	2	450	2
191	1	1	2	2	17	2	1	1	2	2	6	1	1	2	2	600	2
192	1	1	1	2	18	1	1	1	1	4	7	2		4	1	8000	2	1	2	1			1	Miniature Pinscher		2	1	4.5	45	2	4	0	30	1	2							7		9			12
193	1	1	1	2	21	5	1	1	1	3	7	1	1	2	2	800	2	1	2	1			1	Poodle		2	2	5	35	2	2	0	30	15	2	1
194	1	1	1	1	13	2	1	1	2	3	6	1	1	3	1	3	3	4	1	2	3	1	1	Yorkshire Terrier		1	1	12	32	3	2	1	10	6	0
195	1	1	1	1	17	5	2		2	4	6	1	1	1	2	300	3	4	2	1			1	Shih Tzu		1	1	5	60	2	2	1	0	1	1	1
196	1	1	2	2	8	4	2		2	3	7	1	1	4	1	5500	2
197	1	1	2	2	18	8	2		2	3	8	2		2	2	300	2
198	1	1	2	2	21	3	2		2	3	7	1	1	1	1	2500	3
199	1	1	2	2	19	2	2		2	3	7	1	1	3	2	900	3
200	1	1	1	2	19	9	1	1	1	3	7	2		2	2	350	2	4	2	1			2	Beagle		2	1	14	80	3	1	0	30	12	5											11	12
201	1	1	2	1	19	3	1	1	1	3	7	1	1	2	2	300	2
202	1	1	1	2	7	5	2		2	2	7	1	1	2	2	200	1	4	1	1			2		Unknown	1	1	4.5	50	2	1	1	30	1	3														14
203	1	1	2	2	10	8	2		2	1	6	1	1	2	2	600	3
204	1	1	2	2	8	2	2		2	2	7	1	1	1	1	300	3
205	1	1	1	1	19	1	1	1	1	2	7	1	1	4	2	800	2	2	2	1			1	Chihuahua		1	1	4	80	2	2	2	20	4	2		2
206	1	1	2	1	21	1	1	1	1	3	7	1	1	3	2	300	2
207	1	1	1	1	17	10	2		2	2	7	1	1	1	2	500	2	4	2	1			1		Unknown	1	1	4	60	3	1	1	1	2	1	1
208	1	1	2	2	11	9	1	1	1	3	7	1	1	2	2	700	2
209	1	1	2	2	15	2	2		2	4	7	1	1	0	1	5000	3
210	1	1	2	1	14	1	1	1	1	1	7	1	1	3	1	4000	3
211	1	1	1	1	19	11	1	1	1	3	7	1	1	2	1	5000	2	4	2	1			1	Maltese		1	1	12	12	3	1	0	30	2	1												12
212	1	1	1	1	19	1	2		2	3	7	1	1	0	1	2500	3	2	1	1			1	Yorkshire Terrier		2	2	3.5	20	2	4	0	20	3	3									9					14
213	1	1	1	1	18	11	1	1	1	3	7	1	1	3	2	770	2	4	1	2	3	2	1	Pomeranian		1	2	5	40	2	2	0	30	2	3						6	7					12
214	1	1	1	1	7	11	2		2	3	7	1	1	5	1	8000	2	4	2	1			2		Unknown	1	1	11	60	3	3	1	0	1	1									9
215	1	1	2	1	6	11	2		2	3	7	2		3	2	300	2
216	1	1	1	2	14	7	1	1	1	1	8	1	2	2	2	415	2	4	2	1			1	Maltese		1	2	6	46	2	2	1	35	2	1		2
217	1	1	1	2	20	6	1	1	1	3	7	1	1	2	2	210	2	3	1	1			1	Poodle		2	2	3	25	3	2	1	30	3	6		2							9		11
218	1	1	1	1	20	3	1	1	1	3	7	1	1	3	1	6000	2	4	2	1			1	Shih Tzu		1	1	7	40	2	4	1	0	4	5												12
219	1	1	1	2	10	12	2		2	3	8	2		4	2	700	2	3	2	1			1	Maltese		1	1	5	25	2	1	0	10	12	5														14
220	1	1	2	2	11	1	2		2	2	6	1	1	4	2	400	3
221	1	1	2	1	16	7	2		2	2	7	1	1	2	1	8000	2
222	1	1	1	1	20	11	1	1	1	1	7	1	1	2	1	6000	2	4	2	1			1	Chihuahua		1	1	5	25	3	2	1	1	1	1	1
223	1	1	1	1	10	3	2		2	1	7	1	1	2	2	450	2	2	2	1			1	Poodle		1	1	3	45	2	2	0	30	4	4		2										12
224	1	1	1	1	7	7	2		2	2	7	1	1	4	2	350	2	4	2	1			2		Unknown	1	1	7	40	2	3	0	40	1	1						6
225	1	1	2	1	15	8	2		2	3	7	2		2	2	300	2
226	1	1	2	2	5	7	2		2	2	7	1	2	3	2	650	2
227	1	1	1	2	19	5	2		2	3	7	1	1	1	2	400	3	2	2	1			1	Poodle		1	2	8	30	3	1	0	10	4	3							7					12
228	1	1	1	1	11	5	2		2	3	7	1	2	1	2	1000	2	4	1	1			1	Chihuahua		1	1	2	20	2	1	1	0	10	4	1
229	1	1	1	1	17	2	1	1	1	4	7	1	1	3	2	1000	2	3	2	1			1	Poodle		1	1	5	59	2	2	0	35	2	10		2		4							11
230	1	1	2	1	17	1	2		2	4	6	2		0	1	2500	3
231	1	1	2	2	20	12	2		2	4	6	1	1	0	2	250	3
232	1	1	2	2	20	8	1	1	1	2	6	2		2	2	350	2
233	1	1	2	2	7	1	2		2	2	7	1	1	2	1	5000	1
234	1	1	1	1	14	9	2		2	1	8	1	1	1	2	260	3	1	2	1			2		Unknown	2	2	10	55	3	5	0	20	1	0
235	1	1	2	1	21	8	1	1	1	3	7	1	1	2	2	580	2
236	1	1	2	2	13	9	1	1	2	3	7	1	1	1	1	5500	3
237	1	1	2	2	11	12	2		2	3	7	1	1	1	2	350	3
238	1	1	1	2	11	1	2		2	3	7	1	1	1	2	300	2	4	2	1			1	Shiba		2	1	5	80	2	2	0	30	2	2						6						12
239	1	1	1	2	11	3	2		2	2	6	1	1	2	2	970	1	3	2	3	14	14	1	Poodle		1	1	10	30	4	2	1	30	10	10			3			6
240	1	1	1	2	2	10	1	1	1	2	7	1	1	7	1	7	2	1	1	1			1	Donggyeong Dog		1	1	4	30	3	2	4	1	2	5		2							9
241	1	1	2	2	8	2	2		2	3	7	2		1	2	300	3
242	1	1	2	2	4	12	2		2	2	7	1	1	2	2	750	2
243	1	1	1	1	20	6	1	1	1	3	7	1	1	4	1	8600	2	4	2	1			1	Poodle		1	1	3	40	2	2	0	40	1	4						6	7		9			12
244	1	1	2	2	16	8	2		2	3	5	2		0	2	170	3
245	1	1	1	1	8	9	2		2	3	7	1	1	3	2	250	3	3	2	1			2		Unknown	1	2	10	60	2	2	1	0	5	3	1
246	1	1	2	2	13	2	2		2	3	6	1	1	4		4800	3
247	1	1	1	2	7	9	2		2	1	7	2		1	2	160	1	3	2	1			1	Shar Pei		1	1	24	100	3	1	1	0	10	50									9			12	13
248	1	1	1	2	12	5	2		2	3	7	1	1	3	1	4500	2	3	2	1			2	Maltese		1	2	3.4	40	2	5	0	10	1	5		2		4
249	1	1	1	2	8	9	2		2	1	6	2		2	2	60	1	4	1	7	2	1	1	Jindo		2	2	13	90	3	4	4	30	7	0
250	1	1	2	2	19	2	2		2	3	8	1	1	1	2	250	3
251	1	1	2	2	7	10	2		2	3	7	1	1	3	2	600	4
252	1	1	2	1	20	2	1	1	1	2	7	1	1	2	2	500	2
253	1	1	1	1	18	12	1	1	1	2	7	1	1	3	2	400	2	4	1	1			1	Chihuahua		1	1	10	50	2	2	1	0	5	2					5							12
254	1	1	1	2	17	8	2		2	2	5	1	1	0	2	170	3	2	2	2	15	15	1	Shih Tzu		2	2	4.7	25	2	4	1	0	5	6		2	3			6
255	1	1	1	2	17	9	1	1	1	4	7	1	1	6	2	500	2	1	2	1			1	Maltese		1	2	2	30	2	2	0	30	4	2				4					9
256	1	1	1	1	14	7	1	1	2	1	8	1	1	2	1	10000	2	3	2	2	3	3	1	Yorkshire Terrier		2	2	3	30	2	1	1	0	3	5												12
257	1	1	2	1	19	4	1	1	1	3	7	1	1	3	2	450	3
258	1	1	1	2	14	10	2		2	3	7	1	1	1	1	3000	2	2	1	3	1	5	1	Maltese		1	1	10	50	3	1	1	0	3	5	1
259	1	1	2	1	7	6	2		2	2	7	1	1	3	2	750	3
260	1	1	2	2	14	8	2		2	4	7	2		3	2	150	3
261	1	1	1	1	9	3	2		2	3	7	1	2	1	1	2000	1	4	2	1			1	Golden Retreiver		1	1	26	30	1	2	1	12	1	1				4
262	1	1	2	1	20	5	2		2	3	7	1	2	1	1	10000	2
263	1	1	2	2	19	1	1	1	1	3	7	2		2	2	400	2
264	1	1	2	2	21	6	1	1	1	2	7	2		3	1	6000	2
265	1	1	1	1	14	3	1	1	2	3	7	1	1	1	2	550	4	2	2	1			2	Mixed		1	2	5	25	2	4	1	0	3	1									9
266	1	1	2	2	8	12	2		2	3	7	2		4	2	200	2
267	1	1	2	2	20	8	2		2	3	6	1	1	0	2	400	4
268	1	1	1	2	19	6	1	2	1	2	7	1	1	2	1	6500	2	2	1	2	12	12	1	ChowChow		1	1	12	70	4	2	2	0	2	6												12
269	1	1	2	2	21	10	1	1	1	2	6	1	1	5	2	400	3
270	1	1	2	2	15	3	1	1	2	3	7	2		2	2	450	2
271	1	1	1	2	7	5	1	1	2	2	7	1	1	1	2	200	3	1	2	1			1	Toy Poodle		2	2	3	20	2	4	0	20	4	0
272	1	1	1	1	16	11	2		2	2	7	1	1	3	1	5000	2	3	2	1			1	Chihuahua		1	2	12	60	3	2	1	0	4	5		2		4	5				9	10
273	1	1	1	2	10	9	2		2	2	6	1	1	4	2	900	2	3	2	1			1	Maltese		1	1	3	24	2	1	1	0	10	0
274	1	1	1	2	10	11	2		2	3	7	1	1	3	2	650	2	4	2	1			1	Grey hound		1	1	20	30	3	2	1	30	3	15									9
275	1	1	2	2	9	6	2		2	3	5	2		2	1	10000	2
276	1	1	2	2	19	2	2		2	3	5	2		1	2	150	3
277	1	1	2	2	5	10	2		2	2	7	2		3	2	300	2
278	1	1	1	2	11	3	2		2	3	7	1	1	4	1	5000	3	1	2	1			2		Unknown	1	1	10	100	3	3	1	0	1	0
279	1	1	2	2	18	8	2		2	3	7	1	1	1	2	600	2
280	1	1	1	1	20	5	1	1	1	3	7	1	1	2	2	280	3	2	1	3	2	5	1	Pug		1	2	7	25	2	2	1	10	2	1		2
281	1	1	1	2	6	1	2		2	2	5	1	1	1	2	190	3	2	2	1			1	Shih Tzu		2	2	6	25	2	3	1	0	10	0
282	1	1	1	1	10		2		2	1	7	1	1	3	1	5000	1	3	1	2	10	10	1	Yorkshire Terrier		1	1	5	55	2	1	1	50	5	12		2	3				7
283	1	1	1	1	14	6	1	1	1	3	5	1	1	1	2	300	2	4	1	1			1	Poodle		1	2	3	15	2	2	1	1	1	3	1
284	1	1	1	1	9	3	1	1	2	2	6	2		2	1	4500	4	4	2	1			2		Unknown	1	2	5	30	2	2	1	0	5	0
285	1	1	1	1	19	11	2		2	2	7	1	1	2	2	450	2	4	2	1			2		Unknown	1	2	7	50	2	1	0	30	5	5												12
286	1	1	1	1	18	6	2		2	2	7	1	1	2	2	500	3	1	2	1			2		Unknown	1	2	10	80	3	4	0	10	20	0
287	1	1	2	2	12	2	2		2	3	5	2		2	2	150	2
288	1	1	2	1	13	5	2		2	3	7	1	1	0	1	2400	3
289	1	1	2	1	21	8	1	1	2	3	7	2		2	2	550	2
290	1	1	1	2	10	11	2		2	3	7	1	1	0	2	160	3	4	2	1			1	Maltese		2	2	2.5	23	2	2	0	40	11	2									9			12
291	1	1	2	2	12	9	2		2	3	7	1	1	1	2	200	4
292	1	1	1	1	19	2	2		2	3	7	1	1	4	2	600	3	2	2	1			1	Poodle		1	2	3	35	2	3	1	0	10	1	1
293	1	1	1	2	3	12	2		2	3	5	2		3	2	150	3	2	2	1			1	Yorkshire Terrier		2	2	3	25	2	2	0	20	2	5	1
294	1	1	2	2	16	2	1	1	2	3	7	1	1	1	1	7000	3
295	1	1	1	2	19	3	1	1	1	3	7	1	1	4	2	600	2	3	1	2	10	10	1	Poodle		1	2	7	30	3	1	0	30	10	10		2	3	4		6	7		9		11	12	13
296	1	1	2	1	16	8	2		2	4	6	1	1	3	2	500	3
297	1	1	1	1	19	9	1	1	1	3	7	1	1	3	1	4000	2	2	2	1			2		Unknown	2	2	10	50	2	2	0	30	1	1								8
298	1	1	1	2	14	12	2		2	2	7	1	1	3	2	400	3	4	2	1			1	Poodle		1	2	8.1	50	2	3	1	10	3	3		2	3				7	8
299	1	1	2	2	15	2	2		2	3	7	1	1	0	2	270	3
300	1	1	2	2	11	3	2		2	2	7	1	1	1	1	4500	2
301	1	1	2	2	11	8	2		2	2	7	1	1	4	1	6000	3
302	1	1	1	1	17	6	1	1	1	2	7	1	1	3	1	6500	2	2	2	1			1	Cocker spaniel		1	2	12	25	3	4	0	30	2	1			3
303	1	1	1	1	16	4	2		2	2	6	1	1	2	2	200	3	4	2	3	2	2	1	Pomeranian		2	2	5	30	3	2	1	0	12	0
304	1	1	2	2	7	10	2		2	2	7	1	1	3	2	150	1
305	1	1	1	1	15	1	1	1	1	3	7	2		2	1	8000	2	3	1	1			1	Chihuahua		1	2	5	35	2	2	1	0	1	2		2
306	1	1	2	2	9	11	1	1	2	2	7	2		1	2	450	2
307	1	1	2	2	3	4	2		2	3	7	2		2	2	1000	2
308	1	1	2	2	7	1	2		2	2	7	2		3	2	480	2
309	1	1	1	2	10	7	2		2	3	6	1	1	3	2	700	3	4	2	1			1	Poodle		1	1	4	27	2	2	1	0	3	4		2			5		7
310	1	1	2	1	15	10	2		2	3	7	1	1	0	2	700	4
311	1	1	1	1	10	8	1	1	1	2	7	1	1	3	1	6000	2	2	1	1			1	Shih Tzu		2	1	12	70	3	1	1	1	3	1			3	4	5
312	1	1	2	1	2	8	2		2	2	7	1	1	3	2	350	1
313	1	1	1	2	13	7	2		2	2	7	1	1	4	2	700	2	3	1	2	5	5	1	Maltese		1	1	20	20	3	3	1	0	2	4		2	3
314	1	1	1	2	9	8	1	1	1	2	7	1	1	2	1	3	2	3	1	1			1	Maltese		1	1	13	21	3	2	1	35	3	2		2	3	4
315	1	1	1	2	4	2	2		2	2	7	1	1	3	2	300	2	2	1	3	5	3	2	Cat		1	2	3	20	3	3	3	2	2	4										10	11
316	1	1	2	2	4	4	2		2	3	6	1	1	2	2	550	3
317	1	1	2	1	4	8	2		2	2	7	1	3	3	2	560	2
318	1	1	1	1	7	3	2		2	3	2	1	2	4	2	160	3	4	1	1			1	Bichon Frise		1	1	4	54	2	3	1	30	1	4			3	4
319	1	1	2	1	19	2	1	1	1	3	8	1	1	3	1	8000	2
320	1	1	1	2	15	11	1	1	1	3	7	1	3	3	2	600	2	1	2	1			1	Maltese		1	1	2.5	32	2	2	1	0	4	12		2				6
321	1	1	1	1	7	7	1	1	1	1	4	1	1	4	1	3	2	3	1	1			1	Shih Tzu		1	1	13	21	2	2	3	2	9	3		2	3
322	1	1	2	1	13	8	2		2	2	7	1	1	1	1	4000	2
323	1	1	2	1	11	3	2		2	2	7	1	1	0	2	120	3
324	1	1	2	2	20	1	2		2	3	7	2		3	1	4000	2
325	1	1	1	1	10	5	1	1	2	3	7	1	1	2	1	3800	3	2	2	1			1	Yorkshire Terrier		1	2	2	30	1	2	1	0	4	2												12
326	1	1	1	1	3	8	2		2	2	7	1	1	2	1	15000	2	3	2	1			2		Unknown	1	1	5	34	3	2	0	30	5	10		2										12
327	1	1	1	2	14	2	2		2	2	7	1	1	4	2	700	2	3	2	1			1	Poodle		1	1	4	28	4	3	1	0	4	6		2				6
328	1	1	2	2	19	8	1	1	1	3	7	2		4	2	250	2
329	1	1	1	2	8	11	2		2	2	7	1	1	3	2	480	1	2	2	2	14	13	2	Schnauzer		1	1	7	80	2	4	1	8	1	3		2	3			6
330	1	1	2	1	20	6	1	1	1	3	7	1	1	2	1	7200	3
331	1	1	2	1	12	11	2		2	3	7	1	1	2	2	600	3
332	1	1	1	2	20	12	1	1	1	3	7	1	1	3	1	5000	2	4	2	1			2		Unknown	2	2	5.2	20	2	4	0	10	2	4												12
333	1	1	1	1	14	3	2		2	2	8	2		4	1	3000	2	4	1	1			1	Dachshund		1	1	9	46	2	2	3	0	2	2	1
334	1	1	2	2	8	1	2		2	2	7	2		3	2	500	1
335	1	1	2	2	2	3	2		2	4	6	1	1	3	2	250	1
336	1	1	2	1	19	10	1	1	2	2	7	1	1	2	1	6000	3
337	1	1	1	1	17	8	1	1	1	2	7	1	1	3	1	8000	2	4	2	1			1	Chihuahua		2	1	5	15	2	2	1	30	2	6		2		4		6
338	1	1	1	2	18	3	1	1	1	2	7	1	1	3	1	6500	2	4	2	1			1	Shih Tzu		2	1	5	25	2	3	1	10	2	2												12
339	1	1	2	2	20	12	1	1	1	2	7	1	1	3	2	700	2
340	1	1	1	2	14	2	1	1	1	3	7	1	1	2	2	500	2	4	2	1			1	Maltese		2	2	12	30	2	4	1	0	5	2		2	3
341	1	1	2	2	5	5	2		2	3	7	1	3	3	2	250	3
342	1	1	1	1	13	9	2		2	2	7	1	1	1	1	4500	3	2	2	1			1	Beagle		1	2	3	20	2	1	1	0	6	2		2	3									12
343	1	1	2	2	17	9	1	1	1	3	5	2		2	1	10000	2
344	1	1	1	2	15	12	1	1	1	2	7	1	1	2	2	400	2	4	2	1			1	Pomeranian		2	2	8	45	2	3	0	30	8	5												12
345	1	1	1	1	3	5	2		2	1	7	2		4	2	40	1	3	2	1			1	Shih Tzu		1	2	2.5	15	2	1	0	30	3	1	1
346	1	1	2	1	3	3	2		2	1	6	2		3	2	550	3
347	1	1	1	1	18	7	1	1	2	2	8	1	1	1	1	10000	2	4	2	1			1	Poodle		1	2	10	50	2	2	2	6	2	2	1
348	1	1	1	2	18	1	1	1	1	3	7	1	1	2	1	5000	2	4	1	2	2	2	2	Pomeranian		1	1	5	30	2	1	1	2	9	8				4
349	1	1	1	2	20	9	1	1	1	3	7	1	1	3	1	8000	2	4	2	1			1	Bichon Frise		2	2	7	27	2	1	0	30	5	3						6
350	1	1	2	2	19	12	2		2	4	5	1	1	1	2	150	3
351	1	1	2	1	3	8	2		2	3	6	2		3	2	350	3
352	1	1	1	2	4	11	2		2	3	6	1	1	4	2	450	1	3	2	1			2	Yorkshire Terrier		2	2	5	35	2	4	0	10	5	4	1
353	1	1	1	2	16	4	1	1	1	2	7	2		2	1	7000	2	1	2	1			1	Bichon Frise		2	1	6.5	50	2	4	1	0	12	10									9		11	12
354	1	1	2	1	13	4	2		2	2	7	1	1	4	2	300	2
355	1	1	1	2	11	4	1	1	1	2	7	2		2	2	1200	2	2	2	1			1	Maltese		1	2	5	30	2	2	1	0	13	4									9
356	1	1	2	1	13	2	2		2	3	7	1	1	2	2	500	1
357	1	1	2	1	6	7	2		2	2	7	2		2	1	2800	3
358	1	1	2	2	21	7	1	1	1	2	7	2		3	2	500	3
359	1	1	1	2	20	10	1	1	1	2	7	1	1	3	2	900	2	2	2	1			1	Toy Poodle		1	1	4	25	2	3	1	0	3	2						6						12
360	1	1	2	1	19	6	2		2	3	7	1	1	3	2	750	3
361	1	1	1	1	14	10	1	1	1	3	7	1	1	4	2	480	2	3	2	1			1	Yorkshire Terrier		1	2	4	60	2	1	0	50	1	1				4					9
362	1	1	2	2	5	5	2		2	2	7	1	2	4	1	10000	2
363	1	1	1	2	16	1	2		2	1	8	1	2	2	2	1000	3	2	2	1			2	Maltese		1	1	13	25	3	1	1	0	16	7								8	9		11
364	1	1	1	2	11	11	2		2	2	6	1	1	4	1	3000	3	2	2	2	5	3	1	Maltese		2	2	5	100	2	2	1	0	5	1		2	3	4
365	1	1	1	1	12	2	2		2	2	7	1	1	1	1	600	3	4	1	1			2	Pomeranian		2	1	10	50	2	2	1	0	3	2						6						12
366	1	1	2	1	14	1	2		2	3	5	1	1	3	1	6500	3
367	1	1	2	1	14	12	2		2	4	7	1	1	3	2	400	1
368	1	1	1	2	20	6	2		2	2	4	1	1	1	1	2000	2	4	1	1			2	Cat		2	2	10	2	3	2	1	0	4	1													13
369	1	1	2	2	6	1	2		2	3	7	1	1	1	2	170	3
370	1	1	2	2	18	11	1	1	2	3	7	1	1	1	2	700	3
371	1	1	1	2	15	9	1	1	1	3	7	1	1	3	1	6000	3	4	2	1			1	Maltese		2	2	5	50	2	2	1	0	1	3									9
372	1	1	1	2	20	1	1	1	1	2	7	1	1	4	2	700	2	2	2	1			1	Poodle		1	2	6	35	2	2	0	20	6	5												12
373	1	1	2	2	8	4	2		2	4	6	1	1	2	2	170	3
374	1	1	1	2	15	3	2		2	1	7	1	1	1	1	3500	2	3	2	1			1	Welsh Corgi		2	2	5	35	2	2	1	0	3	1	1
375	1	1	2	1	20	12	1	1	2	4	7	1	1	1	1	6000	3
376	1	1	1	1	16	5	1	1	2	2	7	1	1	1	1	4000	2	2	2	1			1	Maltese		2	1	2	25	2	3	0	40	5	4		2	3						9		11	12
377	1	1	2	1	5	5	2		2	3	5	2		3	2	190	3
378	1	1	1	2	21	11	1	1	1	2	7	1	1	4	2	700	2	4	2	1			1	Jindo		1	2	15	60	2	2	1	10	5	1		2
379	1	1	2	2	9	2	2		2	2	7	1	1	4	2	800	2
380	1	1	1	1	16	4	1	1	1	2	7	1	2	2	2	950	2	2	2	1			1	Cocker spaniel		1	2	12	60	3	1	1	30	12	12	1
381	1	1	2	1	18	11	1	1	1	3	7	1	1	2	1	4000	2
382	1	1	1	1	14	3	2		2	2	8	1	1	3	1	4000	2	2	1	2	3	5	1	Poodle		1	1	6	25	3	3	2	3	5	2						6		8
383	1	1	1	1	14	12	1	1	1	2	7	1	1	3	2	300	2	2	2	2	2	2	1	Yorkshire Terrier		1	1	3	3	2	2	1	30	1	2		2	3	4
384	1	1	2	2	9	11	2		2	2	7	1	1	0	2	200	4
385	1	1	1	2	17	5	2		2	3	7	2		0	2	250	1	4	2	1			2		Unknown	1	1	5	20	2	4	1	0	3	2												12
386	1	1	2	2	20	10	1	1	1	2	7	2		3	2	600	2
387	1	1	2	1	6	10	2		2	1	6	2		0	1	9800	3
388	1	1	2	2	16	2	2		2	2	7	2		4	2	920	3
389	1	1	2	1	18	1	2		2	2	6	1	1	3	2	550	3
390	1	1	1	2	20	6	1	1	1	1	7	2		3	2	500	2	2	1	2	10	10	1	Pomeranian		2	1	10	20	2	2	1	30	1	0
391	1	1	1	2	11	4	2		2	1	7	1	1	2	1	7000	3	4	2	1			1	Poodle		1	1	5.5	50	2	1	1	0	1	5											11	12
392	1	1	1	1	19	7	1	1	1	3	8	1	1	4	2	460	3	1	1	1			1	Poodle		1	2	0.8	20	3	5	0	30	1	1				4
393	1	1	2	1	19	12	2		2	3	8	1	1	3	2	620	2
394	1	1	1	2	6	8	2		2	2	7	1	1	4	1	7800	3	4	2	2	4	4	1	Yorkshire Terrier		1	1	4	80	2	2	0	30	3	2						6			9
395	1	1	2	2	19	4	2		2	3	7	1	1	2	2	800	2
396	1	1	2	2	16	10	2		2	3	7	1	1	3	1	880	2
397	1	1	2	2	15	2	2		2	4	7	1	1	3	1	8000	2
398	1	1	2	1	16	6	2		2	4	6	2		2	2	400	2
399	1	1	2	1	21	7	2		2	4	7	1	1	1	2	200	1
400	1	1	2	2	18	12	1	1	2	2	8	1	1	1	2	600	3
401	1	1	1	1	20	9	2		2	2	7	2		4	2	1000	1	4	2	1			1	Jindo		1	2	10	30	3	3	1	1	1	1	1
402	1	1	2	1	18	9	1	1	1	3	7	1	1	3	2	300	2
403	1	1	1	2	4	12	2		2	3	6	1	1	2	2	600	3	4	2	1			2		Unknown	1	1	4	45	2	2	1	0	20	5									9		11	12
404	1	1	2	2	8	2	2		2	4	5	1	1	0	2	170	4
405	1	1	2	2	15	4	2		2	2	8	1	1	4	1	20000	3
406	1	1	2	2	20	9	1	1	1	1	8	1	1	2	2	370	2
407	1	1	1	2	17	2	2		2	3	8	1	1	4	1	2100	2	3	1	1			1	Poodle		2	2	4	80	2	1	0	40	2	2	1
408	1	1	1	2	14	5	1	1	1	2	7	1	1	2	2	1000	3	4	2	1			1	Shih Tzu		2	2	8	50	2	4	1	0	1	1	1
409	1	1	2	2	4	9	2		2	2	7	1	1	3	2	300	2
410	1	1	1	2	17	2	1	1	1	3	6	1	1	5	2	450	3	2	1	2	13	13	2		Unknown	1	2	9	50	3	2	5	30	7	2					5
411	1	1	2	1	2	2	2		2	3	5	1	2	3	2	450	2
412	1	1	2	1	19	2	2		2	2	8	2		3	2	500	3
413	1	1	2	1	19	5	1	1	1	3	8	1	1	3	2	1000	2
414	1	1	2	1	8	8	2		2	3	7	2		1	2	150	2
415	1	1	2	1	6	2	2		2	3	7	1	1	1	1	500	3
416	1	1	2	2	9	12	2		2	3	6	2		4	2	2000	2
417	1	1	2	1	19	10	2		2	2	7	1	1	2	2	300	2
418	1	1	2	2	20	12	2		2	3	7	2		1	1	5700	2
419	1	1	2	2	12	8	2		2	2	7	1	1	1	2	450	3
420	1	1	1	1	19	12	1	1	1	2	7	2		3	2	450	2	3	2	1			1	Yorkshire Terrier		2	1	4	50	2	1	0	30	2	4												12
421	1	1	1	2	13	2	2		2	2	7	1	1	1	2	400	2	4	2	1			1	Maltese		1	2	4.6	20	2	4	1	0	8	12			3						9
422	1	1	2	2	12	9	2		2	3	7	1	1	3	2	1200	2
423	1	1	1	2	8	8	2		2	3	7	1	1	2	1	8000	2	4	1	2	2	2	1	Bichon Frise		1	2	5	100	2	2	1	1	1	1				4
424	1	1	2	1	19	4	1	1	1	3	7	1	1	4	2	500	2
425	1	1	2	2	17	11	1	1	1	2	6	1	1	2	2	650	2
426	1	1	1	2	15	1	1	2	1	2	6	1	2	2	2	350	3	4	1	3	3	2	1	Jindo		1	2	12	120	3	2	1	20	7	6											11	12
427	1	1	1	1	9	2	2		2	3	7	1	1	2	2	350	3	3	2	1			2		Unknown	1	2	11	40	3	5	0	40	1	0
428	1	1	1	2	4	10	2		2	3	5	1	1	4	2	70	2	4	2	1			2	Shih Tzu		2	1	3	35	2	2	1	0	1	5		2							9			12
429	1	1	1	2	6	10	2		2	4	7	1	1	4	2	250	2	4	2	1			2	Mixed		2	1	5	28	2	2	0	30	1	5		2							9			12
430	1	1	2	2	20	6	1	1	2	3	8	1	1	1	2	400	3
431	1	1	2	1	20	9	2		2	3	7	1	1	0	1	7000	4
432	1	1	1	2	16	2	2		2	2	7	1	1	3	2	500	1	1	2	1			2		Unknown	1	2	5	20	2	2	0	30	8	6		2	3						9		11	12
433	1	1	1	2	14	8	1	1	1	2	7	2		2	2	380	2	4	2	1			1	Yorkshire Terrier		1	1	4	30	2	3	0	50	24	5						6			9			12
434	1	1	2	1	18	8	1	1	1	3	7	1	1	3	1	8500	2
435	1	1	1	2	4	3	2		2	2	7	1	1	3	2	500	2	4	2	1			2	Maltese		1	1	3.8	60	2	1	0	10	4	10						6						12
436	1	1	1	1	5	5	2		2	2	7	2		4	2	350	2	3	2	2	5	5	1	Bichon Frise		1	1	6	30	2	1	1	1	4	3											11	12
437	1	1	2	2	18	7	1	1	2	2	5	1	1	1	2	350	3
438	1	1	2	2	20	3	2		2	3	8	1	1	0	2	300	1
439	1	1	2	2	14	9	2		2	4	7	1	1	2	1	3000	3
440	1	1	1	1	16	3	2		2	3	7	1	1	1		0	1	4	1	2	1	1	1	Shih Tzu		1	1	11	11	3	3	1	11	1	1	1
441	1	1	2	2	11	10	1	1	2	2	6	1	1	1	1	6000	3
442	1	1	2	1	17	4	1	1	2	3	7	2		1	1	7600	3
443	1	1	1	1	15	3	2		2	1	6	1	1	1	1	4800	3	4	2	1			1	Schnauzer		2	1	11	40	2	1	1	0	10	3													13
444	1	1	1	2	14	1	1	1	1	3	7	1	1	2	1	8244	2	4	2	2	3	3	1	Bichon Frise		2	2	4.6	20	2	3	1	0	5	0
445	1	1	1	2	17	3	2		2	3	7	1	1	1	2	380	4	2	2	1			2	Yorkshire Terrier		1	2	5	60	2	3	1	0	6	5		2	3	4	5		7	8
446	1	1	2	2	10	1	2		2	2	7	2		0	2	250	2
447	1	1	1	2	16	4	1	1	1	1	6	1	3	4	2	700	2	4	1	1			1	Pomeranian		2	1	4	18	2	2	0	30	5	3						6			9			12
448	1	1	2	1	9	9	2		2	2	6	1	3	2	2	300	3
449	1	1	2	2	9	9	2		2	3	7	1	1	1	1	3500	3
450	1	1	1	2	7	5	2		2	2	7	2		3	2	1500	2	4	2	1			1	Dachshund		1	1	10	30	2	2	1	30	3	6	1
451	1	1	2	2	13	11	2		2	3	7	2		2	2	90	3
452	1	1	1	2	11	10	2		2	2	7	1	2	2	1	3000	2	4	2	1			1	Chihuahua		2	2	4	50	2	3	1	40	4	3					5
453	1	1	2	2	12	4	2		2	2	6	1	1	1	2	320	1
454	1	1	2	1	9	4	2		2	2	7	2		3	2	20	3
455	1	1	2	2	15	4	1	1	1	3	8	1	1	3	2	700	2
456	1	1	1	2	5	6	2		2	3	7	1	1	3	2	300	1	2	2	1			1	Cocker spaniel		1	2	20	40	3	5	0	30	1	0
457	1	1	1	1	13	7	1	1	2	3	8	1	1	2	1	5500	2	4	2	1			1	Jindo		1	2	30	100	4	3	1	30	3	0
458	1	1	2	2	7	9	2		2	2	7	2		4	2	500	2
459	1	1	2	2	5	11	2		2	2	7	2		0	2	800	3
460	1	1	1	2	9	11	2		2	3	6	1	1	3	2	360	3	3	2	1			1	Poodle		2	1	4	27	2	4	1	0	12	10									9					14
461	1	1	1	1	10	4	2		2	2	7	1	1	3	2	500	3	2	2	2	5	5	1	Pomeranian		1	1	2	16	2	2	1	30	5	12									9			12
462	1	1	1	2	12	7	2		2	3	8	1	1	3	1	9000	2	1	2	1			1	Welsh Corgi		2	2	10	80	3	3	1	0	1	5	1
463	1	1	1	1	15	2	1	1	1	1	1	1	1	52	1	2510	2	2	1	1			1		Unknown	1	1	42	42	2	3	1	1	1	1		2
464	1	1	2	1	8	11	2		2	2	7	2		3	2	30	2
465	1	1	2	2	5	2	1	1	1	3	6	1	1	4	2	150	3
466	1	1	2	2	20	4	1	1	1	3	8	2		2	2	450	2
467	1	1	2	2	17	7	2		2	2	7	2		2	1	9000	2
468	1	1	2	1	20	7	2		2	4	7	1	1	0	1	4500	3
469	1	1	2	1	18	10	1	1	2	3	7	1	1	1	1	8000	3
470	1	1	1	2	12	7	2		2	3	7	1	1	0	1	2500	3	4	2	2	12	12	1	Dachshund		1	2	6	25	2	2	0	30	6	14			3						9		11
471	1	1	2	2	17	6	2		2	3	7	2		3	2	900	1
472	1	1	1	1	6	12	2		2	2	6	1	1	2	2	300	3	4	2	2	5	5	2	Poodle		1	1	4	28	2	4	2	0	10	0
473	1	1	2	1	14	8	2		2	2	5	2		0	1	0	2
474	1	1	2	1	21	6	1	1	1	3	5	1	1	3	2	420	2
475	1	1	2	1	20	10	2		2	2	7	2		2	2	400	2
476	1	1	1	2	9	7	1	1	1	2	7	1	1	4	1	8000	2	3	2	1			1	Jindo		2	1	10	30	1	1	1	0	3	3	1
477	1	1	2	2	21	5	2		2	3	7	1	1	1	1	8000	2
478	1	1	1	2	21	1	1	1	1	2	7	1	3	4	2	700	2	3	1	2	8	8	1	Poodle		2	2	5	20	2	2	1	0	20	6			3						9			12
479	1	1	1	2	19	6	1	1	1	3	8	1	1	4	2	550	2	2	1	1			2		Unknown	2	2	13	60	3	1	0	12	2	2									9
480	1	1	2	2	17	10	1	1	1	2	7	1	1	3	2	290	2
481	1	1	1	2	5	4	2		2	2	7	1	1	2	2	300	2	2	2	1			1	Shih Tzu		1	1	5	80	2	1	0	10	4	0
482	1	1	1	2	9	3	2		2	1	6	1	3	3	2	200	3	1	1	2	11	11	1	Maltese		1	1	3	60	2	2	1	1	1	1		2
483	1	1	1	2	17	11	1	1	1	3	7	1	1	3	1	5000	2	4	2	1			1	Pomeranian		1	2	5	30	2	2	1	10	3	8		2	3				7		9
484	1	1	2	2	15	8	1	1	1	3	7	1	1	2	1	10000	2
485	1	1	1	2	7	10	2		2	3	6	1	1	3	2	250	3	2	2	1			1	Pomeranian		2	2	5	20	2	4	0	15	5	1	1
486	1	1	2	2	17	1	1	1	2	3	7	1	1	1	1	39200	3
487	1	1	2	1	12	5	1	1	2	2	7	1	1	1	2	350	3
488	1	1	2	1	9	11	2		2	4	7	2		3	2	40	2
489	1	1	1	1	20	7	1	1	1	1	8	2		2	2	520	3	4	1	1			2		Unknown	1	1	5	25	2	3	1	0	1	2												12
490	1	1	1	1	17	12	2		2	2	6	1	1	3	1	4000	3	4	2	1			1	Chihuahua		1	1	10	80	2	2	2	39	2	5		2
491	1	1	2	2	13	9	2		2	3	7	1	1	4	1	4000	2
492	1	1	2	2	6	10	2		2	3	7	1	1	3	2	700	2
493	1	1	2	2	3	1	2		2	3	7	2		4	2	700	2
494	1	1	1	1	21	6	1	1	1	2	7	1	1	2	1	20000	2	2	1	1			1	German Shepherd		1	1	3	6	2	2	2	22	2	4			3	4	5
495	1	1	1	1	12	9	2		2	1	7	1	1	5	2	1000	2	4	2	1			1	Shiba		2	1	9	36	4	1	1	0	3	5	1
496	1	1	1	1	8	4	2		2	2	7	1	1	1	1	3500	3	4	2	1			1	Chihuahua		1	2	0.8	70	2	2	1	1	1	2		2
497	1	1	2	2	12	8	2		2	5	7	2		1	2	230	1
498	1	1	2	1	21	6	1	1	1	2	7	1	1	3	2	550	3
499	1	1	2	1	14	7	2		2	3	8	2		3	2	800	3
500	1	1	2	2	14	5	1	1	1	3	7	2		3	2	450	3
501	1	1	1	2	8	12	2		2	2	7	1	1	3	1	6000	3	2	2	1			1	Poodle		2	1	6	50	2	2	1	1	9	4									9			12
502	1	1	1	1	18	7	2		2	3	7	1	1	0	2	550	1	4	2	1			1	Maltese		1	2	10	25	2	1	1	0	10	12									9
503	1	1	2	1	17	10	1	1	1	2	7	2		4	1	7000	3
504	1	1	2	2	14	1	1	1	1	2	8	1	1	2	1	10000	2
505	1	1	1	1	12	3	2		2	2	8	1	1	2	2	300	4	3	2	1			1	Shih Tzu		1	2	7	50	3	1	1	0	3	6														14
506	1	1	1	1	11	11	2		2	2	7	1	1	3	2	900	2	2	1	2	3	3	1	Maltese		2	1	3	30	2	2	1	0	4	4		2					7		9
507	1	1	2	2	10	5	2		2	4	7	1	1	2	2	189	3
508	1	1	1	2	18	9	1	1	1	2	7	1	1	4	1	10000	2	3	2	2	6	6	1	Schnauzer		1	1	8	50	2	2	1	30	2	4									9		11
509	1	1	2	2	13	5	2		2	2	8	1	1	4	2	300	2
510	1	1	1	2	6	11	2		2	2	8	1	1	3	1	700	2	4	2	1			1	Maltese		1	2	2.5	25	2	1	0	20	10	12											11	12
511	1	1	2	1	11	11	2		2	2	7	1	1	3	1	12000	2
512	1	1	1	1	21	11	1	1	1	3	7	1	1	5	2	360	2	4	2	2	3	3	1	Welsh Corgi		1	2	12	85	3	3	1	30	1	2		2				6
513	1	1	1	2	14	8	2		2	3	8	1	1	4	2	600	2	4	2	1			2		Unknown	1	2	3	20	2	1	1	30	4	3						6						12
514	1	1	1	2	17	8	1	4	2	3	7	1	1	0	1	3600	3	2	2	1			1	spitz		2	2	6	25	2	1	0	30	8	20						6					11	12
515	1	1	1	2	18	8	2		2	3	7	1	3	0	2	200	3	4	2	2	13	10	1	Yorkshire Terrier		2	2	3	35	2	4	0	30	12	10						6								14
516	1	1	2	1	15	9	2		2	2	7	1	1	1	2	200	3
517	1	1	2	2	17	1	1	4	1	1	6	1	1	1	2	300	3
518	1	1	1	2	15	11	2		2	2	7	1	1	0	2	250	3	4	2	1			1	Poodle		2	2	6	25	2	1	0	20	16	5							7		9
519	1	1	1	2	7	3	2		2	4	7	2		3	2	300	3	2	1	1			2	Mixed		2	1	10	80	3	1	1	0	15	24						6
520	1	1	2	2	13	1	2		2	4	7	1	1	1	2	210	3
521	1	1	1	2	14	2	1	1	1	3	7	1	1	3	1	6000	2	4	2	1			1	Cocker spaniel		1	2	12	27	3	4	0	30	1	2						6					11
522	1	1	1	2	13	10	1	1	1	3	7	1	2	3	1	7000	2	2	2	1			1	Pomeranian		2	2	3	30	2	2	1	0	20	3												12
523	1	1	1	2	10	12	2		1	1	7	1	1	4	1	6769	2	4	1	3	4	2	2		Unknown	1	1	11	16	2	3	3	2	2	2				4		6			9
524	1	1	1	2	18	12	1	1	2	1	7	1	1	1	2	800	2	4	2	1			1	Maltese		1	1	5	18	2	2	0	30	5	2		2									11
525	1	1	2	2	15	5	2		2	3	8	1	1	3	2	400	2
526	1	1	2	2	8	3	2		2	2	6	1	1	0	1	2200	3
527	1	1	2	1	12	11	2		2	1	8	1	1	3	2	50	3
528	1	1	2	2	17	7	1	1	2	2	7	1	1	1	1	10000	3
529	1	1	1	2	9	10	1	1	2	1	7	1	1	2	2	500	1	2	2	1			2	Maltese		1	1	5	25	2	3	1	0	10	3						6
530	1	1	2	1	20	3	2		2	4	8	1	1	2	1	10000	2
531	1	1	1	1	9	9	2		2	4	7	1	1	4	2	200	2	4	2	1			1	Pomeranian		2	2	3	50	2	4	1	0	6	3							7
532	1	1	1	2	17	4	2		2	2	8	1	1	0	1	2900	4	4	2	1			1	Maltese		1	1	5	50	2	3	3	0	72	0
533	1	1	1	1	15	1	2		2	3	7	1	1	1	2	600	3	4	2	1			1	Maltese		2	2	8	25	2	1	1	0	4	4		2	3	4
534	1	1	1	1	11	5	2		2	3	7	1	1	3	1	7000	2	4	2	1			1	Yorkshire Terrier		1	1	2.5	30	2	2	1	0	3	2	1
535	1	1	2	2	16	1	2		2	4	7	1	1	3	2	300	2
536	1	1	2	2	10	10	2		2	3	8	1	1	3	2	500	3
537	1	1	1	1	13	7	2		2	2	7	1	1	3	1	5000	2	3	2	1			2		Unknown	1	1	5	60	2	3	1	0	3	5		2							9		11	12
538	1	1	2	1	13	2	2		2	2	8	1	1	2	2	500	3
539	1	1	1	1	16	11	2		2	2	7	1	1	1	2	300	3	4	1	1			2	Poodle		1	2	5	20	2	1	1	0	1	3				4	5
540	1	1	2	2	16	7	1	1	1	2	7	1	1	6	1	6000	2
541	1	1	2	1	11	1	2		2	3	8	1	1	4	1	15000	2
542	1	1	1	2	16	7	1	1	1	2	7	1	1	3	1	12000	2	4	1	2	5	3	1	Standard poodle		2	2	7	70	3	2	1	0	5	4			3	4					9			12
543	1	1	1	2	6	4	2		2	3	7	1	1	3	1	5000	2	2	2	1			1	Maltese		1	1	10	72	2	2	0	40	2	3						6	7
544	1	1	2	2	20	11	1	1	1	4	7	2		3	2	400	2
545	1	1	1	1	19	10	1	1	1	3	7	1	1	2	2	650	2	3	1	1			1	Yorkshire Terrier		2	2	5	50	2	1	1	0	1	3		2
546	1	1	2	1	20	10	2		2	3	6	1	1	2	2	350	2
547	1	1	2	2	12	7	1	1	2	3	7	1	1	1	1	6000	3
548	1	1	1	1	9	5	2		2	1	7	1	1	3	2	280	2	2	2	1			1	Poodle		1	2	3	30	1	2	1	0	2	5	1
549	1	1	1	1	17	1	1	1	1	3	7	1	2	1	1	4000	3	4	1	1			1	Maltese		2	2	3	50	2	2	1	0	2	5						6							13
550	1	1	1	2	5	12	2		2	3	7	1	1	4	2	600	2	3	2	1			1	Shih Tzu		2	1	9	80	2	2	1	10	3	4									9			12
551	1	1	2	1	17	7	2		2	2	8	1	1	2	2	350	3
552	1	1	2	2	11	12	2		2	3	7	1	1	4	2	900	3
553	1	1	1	1	11	2	2		2	2	7	1	1	3	2	50	2	4	2	1			1	Shih Tzu		1	1	5	50	2	3	1	0	2	5									9			12
554	1	1	1	2	19	6	1	1	1	3	6	1	1	3	1	500	1	4	2	1			1	Poodle		2	2	5	25	2	4	2	20	1	0
555	1	1	2	1	20	7	2		2	3	7	1	2	4	2	40	2
556	1	1	1	1	15	1	1	1	2	3	7	1	1	1	1	8000	2	4	2	1			1	Poodle		1	1	6	80	2	2	1	0	3	2		2										12
557	1	1	1	2	11	11	1	1	1	1	7	1	1	2	1	8000	2	3	1	2	3	3	2	Pomeranian		1	1	12	50	3	2	1	0	2	2											11	12	13
558	1	1	2	2	15	12	1	1	1	2	6	2		2	2	250	3
559	1	1	2	2	21	2	1	1	1	2	7	1	3	4	2	600	2
560	1	1	2	2	10	12	1	1	2	2	7	1	1	1	1	6000	2
561	1	1	1	2	18	6	1	1	2	2	6	1	1	1	2	400	2	3	2	1			1	Pomeranian		2	2	2.5	27	2	3	1	0	18	2									9			12
562	1	1	1	1	5	7	2		2	3	7	2		2	2	550	2	4	1	1			2	Welsh Corgi		2	1	6	25	2	1	1	30	7	5											11	12
563	1	1	1	2	17	7	1	1	2	2	8	1	2	1	2	300	3	4	2	1			1	Boston Terrier		1	1	7.6	40	2	1	1	0	16	15			3				7		9
564	1	1	1	2	18	6	1	1	1	2	7	2		3	2	550	2	4	2	1			1	Shiba		1	2	10	36	2	2	0	40	8	2									9			12
565	1	1	1	1	13	10	2		2	1	7	2		3	1	10000	2	4	2	1			1	Shih Tzu		1	1	6	26	2	2	0	20	2	4												12
566	1	1	2	2	12	8	1	1	2	2	8	1	1	1	2	600	3
567	1	1	2	1	21	2	1	1	1	2	7	1	1	4	2	200	2
568	1	1	1	2	14	4	1	1	1	2	7	1	1	2	1	2500	2	1	1	1			1	Cocker spaniel		1	2	10	80	3	2	1	0	3	5	1
569	1	1	2	2	4	1	2		2	3	7	2		0	2	40	3
570	1	1	2	2	2	4	2		2	2	7	1	1	3	2	100	3
571	1	1	2	2	11	3	2		2	1	7	1	1	4	2	500	2
572	1	1	2	2	11	9	2		2	3	6	1	1	4	2	350	2
573	1	1	1	2	15	1	2		2	2	7	2		3	1	500	3	4	2	1			1	Poodle		1	2	5	36	2	2	1	0	5	1	1
574	1	1	2	2	17	2	1	1	1	3	6	2		3	2	200	2
575	1	1	2	2	18	4	1	1	1	3	7	1	1	5	2	650	2
576	1	1	1	2	14	6	1	1	1	1	7	1	1	4	2	500	2	1	1	1			2	Jindo		1	2	15	100	3	1	1	30	1	1	1
577	1	1	2	2	20	6	1	1	1	3	8	2		3	1	3800	2
578	1	1	2	2	16	10	1	1	1	2	7	2		2	2	500	2
579	1	1	1	2	20	2	1	1	1	4	7	1	1	3	1	5000	2	3	1	2	2	5	1	Maltese		1	1	5	20	2	3	1	10	2	10							7
580	1	1	2	2	6	10	2		2	4	7	1	1	0	2	50	4
581	1	1	2	1	13	10	1	1	2	2	7	1	1	1	2	600	3
582	1	1	2	2	15	6	2		2	3	6	1	1	2	2	390	1
583	1	1	1	2	15	4	2		2	2	5	1	1	4	1	10000	3	3	2	1			2		Unknown	1	1	7.8	25	3	2	1	0	4	1	1
584	1	1	1	2	15	6	2		2	2	7	1	1	0	1	35000	2	4	2	1			1	Chihuahua		2	1	1.8	25	1	1	1	30	5	4		2	3									12
585	1	1	1	1	20	3	1	1	1	3	7	1	1	2	1	500	3	4	2	1			2		Unknown	1	2	15	70	3	4	1	0	1	2									9
586	1	1	2	2	20	11	1	1	1	2	6	2		3	2	390	2
587	1	1	1	2	18	10	2		2	2	7	1	1	0	2	250	3	1	2	1			1	French Bulldog		1	1	11	27	3	2	1	30	4	2						6			9
588	1	1	2	2	8	12	2		2	4	6	2		3	2	180	2
589	1	1	1	2	17	3	1	1	1	2	7	1	1	3	2	250	3	1	2	1			1	Maltese		1	1	10	50	3	1	0	30	3	1	1
590	1	1	1	2	14	2	1	1	1	3	7	1	1	2	1	5000	2	2	2	1			1	Maltese		2	2	4	50	2	3	0	30	3	1											11
591	1	1	2	1	20	4	1	1	2	2	7	1	1	1	1	4000	2
592	1	1	1	1	9	9	2		2	2	7	1	1	2	2	700	2	4	2	1			1	Poodle		1	2	4	50	2	4	1	20	2	4	1
593	1	1	2	2	10	11	2		2	3	7	1	1	2	2	1000	2
594	1	1	1	2	16	3	1	1	2	2	7	2		2	2	400	3	4	2	1			2		Unknown	1	1	4	50	2	4	1	0	2	2						6						12
595	1	1	2	2	20	12	1	1	2	2	7	2		1	2	300	2
596	1	1	2	1	19	1	1	1	1	2	7	1	1	2	1	6000	2
597	1	1	1	1	19	11	1	1	1	3	7	1	1	2	2	20	2	3	1	1			1	Golden Retreiver		2	1	30	150	4	3	1	0	5	2			3
598	1	1	2	2	21	8	1	1	1	3	7	1	1	3	2	700	2
599	1	1	1	2	14	9	1	1	2	3	7	1	1	1	2	600	3	4	2	1			1	Cocker spaniel		2	1	9	75	3	4	1	0	12	10									9
600	1	1	2	1	20	6	1	1	1	2	6	1	1	3	1	5000	2
601	1	1	2	2	8	4	2		2	2	7	1	1	2	2	350	2
602	1	1	2	1	12	11	1	1	1	2	7	1	1	2	2	220	2
603	1	1	1	1	18	1	2		2	3	7	1	1	2	2	250	2	4	2	1			2	Shih Tzu		2	2	3	40	2	1	0	40	12	4			3						9			12
604	1	1	2	1	8	7	2		2	3	5	1	1	3	2	200	3
605	1	1	1	2	11	4	2		2	2	6	2		3	2	300	3	4	2	1			1	Maltese		1	1	4	36	2	3	0	30	7	12						6		8	9			12	13
606	1	1	2	1	19	12	2		2	2	7	2		3	2	100	3
607	1	1	2	2	7	10	2		2	2	6	1	1	3	2	1000	2
608	1	1	2	2	11	6	2		2	3	7	1	1	3	2	250	2
609	1	1	1	2	9	12	1	1	2	4	6	1	1	1	1	5500	3	4	2	1			2	Maltese		2	2	2	24	2	3	1	15	4	4						6						12
610	1	1	1	2	9	10	2		2	2	7	1	1	0	2	150	3	3	2	1			1	Maltese		2	2	4	2.9	2	3	1	60	12	9		2							9
611	1	1	1	2	7	11	2		2	3	7	1	2	6	2	300	3	3	2	1			1	Maltese		1	1	4	60	2	3	1	0	3	7									9			12
612	1	1	1	1	9	2	2		2	3	7	1	1	2	2	150	3	3	2	2	11	11	1	Maltese		2	1	3.5	30	2	2	0	20	7	6									9
613	1	1	1	2	10	11	2		2	2	7	1	1	3	1	4000	3	3	2	2	14	14	2	Poodle		1	1	5	15	2	1	0	30	2	10					5
614	1	1	1	2	20	11	2		2	2	7	1	1	4	2	450	1	2	2	1			1	Poodle		2	2	5	40	2	2	1	5	5	1			3						9
615	1	1	1	1	11	3	2		2	2	7	1	1	3	2	280	2	2	1	1			1	Maltese		1	2	5	40	2	1	1	0	3	10				4		6
616	1	1	1	2	4	11	2		2	2	5	1	1	1	2	130	3	2	2	1			1	Pomeranian		1	1	6	30	2	2	0	40	17	5									9
617	1	1	1	2	18	5	1	1	1	2	6	2		3	2	300	2	4	2	1			2		Unknown	2	1	5	60	2	2	1	0	6	15		2										12
618	1	1	1	2	9	12	2		2	1	7	1	1	1	1	3000	2	1	1	1			1	Poodle		1	1	6	60	2	2	1	30	8	5											11	12
619	1	1	1	1	18	12	2		2	3	7	1	1	2	1	2500	1	4	1	1			1	Golden Retreiver		1	1	15	90	3	2	1	30	1	0
620	1	1	2	2	9	2	2		2	3	7	1	1	3	2	550	2
621	1	1	1	1	18	11	1	1	1	3	7	1	1	3	2	750	2	1	1	1			1	Pomeranian		1	2	5.5	35	2	2	1	0	5	3						6			9			12
622	1	1	1	2	16	4	1	1	1	2	7	1	1	3	2	500	2	2	1	1			1	Maltese		2	1	3	18	2	2	1	5	1	3		2	3
623	1	1	2	2	21	1	1	1	1	3	7	1	1	2	2	750	2
624	1	1	2	2	20	12	2		2	2	8	2		2	2	500	2
625	1	1	1	1	20	3	1	1	1	2	7	1	1	3	2	600	2	1	1	1			2		Unknown	1	2	16	60	3	2	1	20	2	5				4					9
626	1	1	2	2	19	8	2		2	3	5	2		2	2	300	3
627	1	1	2	1	13	4	2		2	1	7	2		3	2	300	2
628	1	1	2	2	10	3	2		2	3	6	1	1	4	2	1000	3
629	1	1	1	1	19	10	1	1	2	1	7	1	1	4	1	20000	2	4	2	1			1	Maltese		2	1	3	20	2	1	0	30	3	15							7				11	12
630	1	1	2	2	16	1	2		2	3	5	2		1	2	250	3
631	1	1	1	2	10	10	2		2	4	5	1	1	1	2	500	3	2	2	1			1	Maltese		1	1	3	30	2	1	1	0	5	0
632	1	1	1	1	14	2	1	1	1	2	7	1	1	3	1	2000	1	4	1	2	2	2	2		Unknown	2	1	6	25	2	2	1	50	3	10				4	5
633	1	1	2	1	20	7	1	1	2	3	7	2		1	2	500	2
634	1	1	2	2	21	7	1	1	2	2	6	1	1	1	2	600	2
635	1	1	2	2	10	5	2		2	2	7	1	1	2	2	200	2
636	1	1	1	1	14	10	1	1	1	3	7	1	1	4	2	480	2	1	2	1			2		Unknown	2	2	5	40	3	2	0	30	1	2			3						9
637	1	1	1	1	16	4	1	1	2	2	7	1	1	2	2	700	1	4	2	1			1	Poodle		2	1	5	25	2	4	1	10	2	5	1
638	1	1	2	1	14	5	2		2	3	7	1	1	0	2	150	3
639	1	1	1	1	20	9	1	1	1	3	7	1	1	3	2	300	3	4	2	1			2		Unknown	1	2	7	85	2	1	1	30	1	0
640	1	1	2	1	16	6	1	1	2	3	7	1	1	1	1	4500	3
641	1	1	1	2	17	1	2		2	2	6	2		1	2	200	3	4	2	1			1	Chihuahua		2	1	2	10	2	2	1	0	1	0
642	1	1	2	2	9	8	2		2	3	7	1	1	0	1	3000	3
643	1	1	1	1	14	1	2		2	3	7	1	1	0	2	200	3	3	2	1			2	Pomeranian		2	2	13	50	2	2	1	12	3	7	1
644	1	1	2	1	16	2	1	1	1	2	8	1	1	3	1	9500	3
645	1	1	1	2	8	9	2		2	3	7	2		0	1	3000	2	3	2	1			1	Poodle		2	1	3.2	23	2	3	1	30	4	5		2					7					12
646	1	1	2	1	21	9	1	1	1	2	7	1	2	3	2	500	2
647	1	1	2	2	21	10	2		2	4	5	1	1	3	2	200	2
648	1	1	1	1	19	10	1	1	1	3	7	1	1	4	2	800	2	4	2	1			1	Poodle		2	2	3	40	2	2	0	30	1	10		2							9			12	13
649	1	1	1	1	19	2	1	1	1	2	8	1	1	4	2	600	2	2	2	4	5	5	1	Maltese		2	2	2	25	1	3	1	0	2	2		2							9
650	1	1	2	1	20	10	2		2	3	7	1	1	3	2	300	1
651	1	1	2	1	19	12	1	1	1	2	7	1	2	3	2	390	2
652	1	1	1	1	12	4	2		2	2	7	1	1	1	2	390	3	4	2	1			2		Unknown	2	1	4	25	2	2	1	0	2	3									9
653	1	1	2	1	13	8	2		2	3	7	2		3	2	1000	3
654	1	1	2	1	5	5	2		2	3	6	2		2	1	2500	3
655	1	1	1	2	14	10	2		2	3	7	1	1	3	2	300	2	4	2	1			2		Unknown	2	2	10	80	2	2	1	1	1	6	1
656	1	1	2	2	13	6	2		2	3	7	1	1	2	2	1000	2
657	1	1	1	1	12	9	2		2	2	7	1	1	2	1	6000	2	3	2	2	1	1	2		Unknown	1	1	21	15	3	2	1	30	5	2		2
658	1	1	1	1	16	3	1	1	1	1	5	1	2	2	2	350	3	3	2	1			1	Maltese		2	2	10	25	2	2	0	30	10	0
659	1	1	1	1	17	3	1	1	2	1	7	1	1	1	2	1300	2	4	2	1			2	Mixed		2	2	10	20	2	2	0	40	4	7		2	3						9			12
660	1	1	2	2	20	2	2		2	3	7	1	1	3	1	6000	3
661	1	1	2	1	18	5	1	1	2	3	7	1	1	1	1	6000	2
662	1	1	2	1	21	7	2		2	3	6	2		2	2	700	3
663	1	1	2	2	10	9	2		2	3	7	1	1	4	2	800	3
664	1	1	1	1	16	1	2		2	1	7	1	1	2	1	6000	3	4	1	1			1	Poodle		1	1	6	25	2	2	1	30	1	4		2		4					9
665	1	1	2	1	18	4	1	1	1	2	7	1	1	2	2	300	2
666	1	1	2	2	12	9	2		2	3	6	1	1	1	2	750	2
667	1	1	2	1	14	9	1	1	1	3	7	1	1	2	2	350	3
668	1	1	1	2	16	9	1	1	1	2	7	1	1	6	2	690	2	4	1	1			1	Pomeranian		1	1	6	23	2	1	1	20	5	15			3	4		6
669	1	1	2	1	14	2	2		2	3	7	1	1	4	1	5000	2
670	1	1	2	2	12	12	2		2	2	8	1	1	0	1	6000	3
671	1	1	2	1	12	12	2		2	2	8	1	1	3	1	2600	2
672	1	1	2	1	19	1	1	1	2	3	5	2		2	2	300	3
673	1	1	1	1	15	2	2		2	3	6	1	1	2	2	390	2	4	2	1			1	Jindo		1	2	2	30	1	1	1	0	3	12						6			9
674	1	1	2	2	15	4	2		2	3	7	1	1	3	2	700	3
675	1	1	1	1	12	3	1	1	1	4	7	1	1	2	1	3000	3	2	2	1			1	Maltese		1	1	9	50	2	4	0	20	1	6									9
676	1	1	2	1	17	7	1	1	1	2	8	1	1	2	1	3000	2
677	1	1	1	1	17	1	2		2	3	6	1	2	2	2	500	3	4	2	1			1	Cocker spaniel		1	1	15	60	3	2	0	30	12	6			3						9		11
678	1	1	2	2	18	7	2		2	2	7	1	1	1	2	300	2
679	1	1	1	1	18	2	1	1	2	2	7	1	2	5	2	1500	2	1	2	1			1	Yorkshire Terrier		1	1	3	30	2	2	1	0	2	2											11
680	1	1	1	1	20	11	1	1	1	2	7	1	1	3	2	800	2	3	1	1			1	Maltese		1	2	7	50	2	3	1	40	8	1											11
681	1	1	2	2	18	6	1	1	2	3	7	2		2	2	400	3
682	1	1	1	1	17	4	2		2	2	5	1	1	1	2	340	2	1	1	1			1	Shih Tzu		1	1	14	52	2	1	1	0	4	4									9
683	1	1	2	1	17	9	1	1	2	1	7	2		2	1	5000	2
684	1	1	2	2	16	3	2		2	4	7	2		2	2	500	3
685	1	1	2	1	19	12	2		2	3	7	1	1	5	2	1	3
686	1	1	2	1	18	4	1	1	1	2	7	1	1	2	2	550	2
687	1	1	1	1	18	8	1	1	1	2	7	1	2	5	2	1800	1	2	1	3	8	8	1	Tibetan Mastiff		2	2	45	70	4	5	0	40	1	0
688	1	1	1	1	14	11	1	1	1	3	7	1	1	3	2	600	2	4	2	1			2		Unknown	2	2	3	16	2	2	1	30	5	5												12
689	1	1	1	1	14	5	1	1	1	2	6	1	1	3	2	300	2	2	1	1			1	Chihuahua		1	1	7	20	3	2	1	30	3	4		2	3									12
690	1	1	1	2	13	10	2		2	2	7	1	1	4	1	3675	1	1	1	1			1	Shih Tzu		2	2	6	25	2	4	0	3	1	0
691	1	1	1	1	15	2	1	1	1	3	8	1	1	3	2	800	2	1	2	1			1	Shih Tzu		2	1	6	25	2	4	0	30	1	5		2							9
692	1	1	1	1	21	1	1	1	1	3	7	2		4	2	300	3	3	2	1			2		Unknown	1	2	5	25	2	3	1	30	1	3		2							9			12
693	1	1	1	1	1	2	1	1	2	2	5	1	2	3	1	30000	2	2	1	2	3	3	1		Unknown	1	1	11	12	1	2	1	1	1	11		2		4
694	1	1	1	1	15	6	1	1	1	3	4	1	1	3	1	23	3	3	1	2	1	1	2		Unknown	1	2	2	23	3	1	1	1	2	1	1
695	1	1	1	1	18	10	1	1	1	3	7	1	1	2	1	4500	2	4	2	1			1	Maltese		2	2	5	35	2	1	0	40	5	12			3						9		11
696	1	1	1	1	10	3	1	1	1	3	7	1	1	20	1	5000	2	4	2	1			1	Beagle		1	1	10	50	3	2	1	0	3	1				4
697	1	1	1	1	16	1	1	1	2	3	6	2		1	2	400	3	4	2	1			1	Golden Retreiver		2	2	10	60	4	5	0	20	1	5	1
698	1	1	1	1	15	7	1	1	1	3	7	1	1	4	1	3500	2	3	2	2	6	6	1	Welsh Corgi		2	1	8	70	2	1	1	2	3	2			3	4
699	1	1	1	2	13	9	1	1	1	1	7	1	1	3	2	1200	2	3	2	1			1	Golden Retreiver		1	2	30	60	4	1	1	0	4	30		2	3	4	5	6	7		9			12	13
700	1	1	1	1	13	1	1	1	2	3	7	1	1	1	2	150	3	3	1	2	3	6	1	Yorkshire Terrier		1	1	5	90	2	3	1	0	2	2		2		4		6			9
701	1	1	1	1	11	1	2		2	3	7	1	1	3	2	400	2	4	2	1			1		Unknown	1	2	5	100	3	2	1	0	3	2						6						12
702	1	1	1	1	12	3	2		2	1	7	2		2	2	160	1	3	2	1			1	Maltese		2	2	4	100	2	5	0	20	1	2									9
703	1	1	1	1	5	10	2		2	2	7	1	3	3	2	500	2	2	2	1			1	Yorkshire Terrier		1	1	10	60	3	4	1	10	2	3		2							9			12
704	1	1	1	1	16	8	2		2	3	7	1	1	1	2	210	4	2	2	1			1	Maltese		1	1	1	20	1	4	0	40	1	2												12
705	1	1	1	1	17	6	1	1	1	3	7	1	1	2	1	600	2	2	1	1			1	Maltese		2	2	5	40	2	2	1	30	5	1		2
706	1	1	1	2	17	7	1	1	1	3	6	1	1	2	2	400	3	4	2	1			1	Yorkshire Terrier		2	2	4	40	2	2	0	30	1	3	1
707	1	1	1	1	17	11	2		2	2	7	1	2	1	1	6071	2	4	2	1			1	Maltese		1	1	7	23	2	1	1	0	4	3									9			12
708	1	1	1	1	14	6	2		2	3	7	1	1	3	2	400	2	2	2	1			1	Bulldog		1	1	25	50	3	2	1	2	2	2				4		6
709	1	1	1	1	19	9	1	1	1	2	7	1	1	4	1	3500	2	4	2	1			1	Poodle		1	2	7	25	2	3	2	30	5	2												12
710	1	1	1	1	18	12	1	1	1	3	7	1	1	2	1	5000	2	3	2	1			1	Poodle		2	2	4	60	2	2	1	0	1	2		2		4			7					12
711	1	1	1	1	18	12	1	1	1	3	7	1	1	3	2	550	2	2	1	3	9	7	1	Maltese		1	1	3.5	40	2	2	1	0	3	1							7
712	1	1	1	1	19	2	1	2	2	2	7	1	1	2	2	500	1	2	2	1			1	Poodle		1	2	5	30	2	2	1	0	6	2											11	12
713	1	1	1	1	19	4	1	1	1	3	8	1	1	3	2	500	2	3	2	1			1	Pug		2	1	13	30	4	2	2	13	3	5	1
714	1	1	1	1	19	12	1	1	1	2	7	1	1	3	2	500	2	4	2	1			1	Chihuahua		2	2	5	50	2	1	0	30	2	4												12
715	1	1	1	1	18	2	2		2	3	6	2		1	2	300	2	4	2	1			1	Maltese		1	1	6	50	2	1	0	30	1	20				4					9			12
716	1	1	1	1	15	7	2		2	2	8	1	1	2	1	8000	3	3	1	3	5	3	1	Maltese		2	2	3	12	2	3	1	0	3	2	1
717	1	1	1	1	14	6	2		2	2	7	1	1	2	2	50	2	3	2	1			1	Cocker spaniel		2	1	12	62	3	2	1	0	1	6	1
718	1	1	1	2	20	6	2		2	1	7	1	2	3	2	1000	2	4	2	1			1	Bichon Frise		2	1	6	25	2	3	1	40	12	2												12
719	1	1	1	1	13	7	2		2	3	7	1	1	1	2	200	3	4	2	1			1	Maltese		1	1	3	80	2	3	0	40	3	3	1
720	1	1	1	1	18	4	2		2	2	7	2		3	2	500	2	4	2	2	6	6	1	Maltese		1	1	5	50	2	1	1	30	3	1							7
721	1	1	1	1	16	4	1	1	1	2	7	1	3	2	1	9000	2	2	2	1			1	Maltese		1	2	8	50	2	2	1	0	1	5		2							9		11	12
722	1	1	1	1	17	1	1	1	1	2	7	1	1	3	2	600	1	1	2	1			2		Unknown	2	2	3	5	2	2	0	30	5	3													13
723	1	1	1	1	17	11	2		2	3	6	1	1	1	2	130	3	4	2	1			1	Miniature Pinscher		2	1	5	12	2	3	1	10	2	4							7		9	10
724	1	1	1	1	14	8	1	1	1	2	7	1	1	4	1	5000	1	4	1	1			1	Jindo		1	2	5	30	2	2	1	0	3	3											11	12
725	1	1	1	1	17	12	2		2	3	6	1	1	3	1	5000	3	4	2	1			2		Unknown	1	2	7	120	2	2	2	10	2	4												12
726	1	1	1	1	17	4	2		2	2	7	1	1	4	1	9000	2	4	2	1			1	American Cocker spaniel		1	2	9	32	2	2	1	0	1	3									9			12
727	1	1	1	1	14	7	2		2	2	7	1	1	2	2	600	2	4	2	1			2	Poodle		1	1	8	80	2	3	0	30	2	0
728	1	1	1	1	16	6	1	1	2	1	8	1	1	1	1	6400	2	4	1	1			2	Pomeranian		1	1	8	70	2	3	0	30	2	4											11	12
729	1	1	1	1	12	4	2		2	3	7	1	2	3	1	3000	2	3	2	1			2	Mixed		1	1	25	35	3	2	1	0	1	4									9			12
730	1	1	1	1	1	4	2		2	3	5	2		2	2	2	3	1	1	1			1	Maltese		1	1	1	1	3	3	1	1	1	1		2
731	1	1	1	1	21	10	1	2	1	2	7	1	1	1	2	300	3	2	1	1			1	Pomeranian		2	1	10	70	2	3	1	1	1	1				4
732	1	1	1	1	21	10	1	1	1	3	7	1	1	3	1	12000	2	4	2	1			1	Jindo		1	1	5	100	2	1	0	30	1	0
733	1	1	1	1	13	4	1	1	1	3	7	1	1	3	1	3500	2	3	2	1			2		Unknown	1	1	15	80	3	3	1	30	5	2					5
734	1	1	1	1	19	10	1	1	1	3	7	1	1	2	1	4000	2	3	2	1			1	Maltese		1	1	10	30	3	3	1	0	5	3	1
735	1	1	1	1	19	5	1	1	1	2	7	1	2	5	2	500	2	4	2	1			1	Shih Tzu		2	1	5	25	2	2	1	0	2	2									9			12
736	1	1	1	2	16	11	1	1	1	2	7	1	1	3	2	370	2	3	2	2	7	7	2	Mixed		2	2	4	35	2	2	0	30	3	3		2
737	1	1	1	2	20	4	2		2	3	7	1	1	0	1	3000	2	4	2	1			2		Unknown	2	1	8	30	2	1	1	0	8	12	1
738	1	1	1	1	17	5	2		2	3	8	1	1	0	2	500	2	4	2	1			1	Poodle		1	2	3	30	2	2	1	30	3	12	1
739	1	1	1	1	12	5	2		2	3	5	1	1	3	2	300	2	4	2	1			1	Poodle		2	2	5	23	2	1	1	10	3	1	1
740	1	1	1	1	12	11	1	1	2	2	7	1	1	1	2	450	2	2	1	1			1	Maltese		1	1	5	70	2	2	1	1	2	2		2
741	1	1	1	2	14	7	1	1	1	3	7	2		4	2	500	2	1	2	1			1	Maltese		2	2	5	28	2	2	1	30	2	2									9		11
742	1	1	1	1	19	8	1	1	1	2	6	1	2	4	2	480	4	1	1	1			1	Maltese		2	2	5	30	2	1	0	30	3	4									9
743	1	1	1	2	8	5	2		2	2	7	1	1	0	2	200	4	4	2	2	2	2	1	English Bulldog		1	1	10	66	3	2	2	0	6	15		2	3	4		6		8	9			12	13
744	1	1	1	2	20	1	1	1	1	2	8	1	2	4	2	450	2	3	1	1			1	Jindo		2	2	18	45	2	3	1	0	2	6	1
745	1	1	1	2	13	8	1	1	2	2	7	1	1	2	1	3500	2	4	2	1			1	Maltese		2	1	8	40	2	2	1	0	5	10		2							9			12
746	1	1	1	1	12	1	2		2	2	7	1	1	4	1	5400	3	3	1	1			1	Jindo		1	2	12	14	2	3	1	4	2	1	1
747	1	1	1	1	20	3	1	1	1	2	7	1	1	4	2	500	2	4	2	1			2		Unknown	1	1	3	20	2	2	2	0	2	8				4								12
748	1	1	1	1	20	10	1	1	1	2	7	1	1	2	1	1000	2	4	2	1			1	Pomeranian		2	1	10	50	2	2	1	0	1	12						6			9
749	1	1	1	2	15	4	2		2	3	5	2		22	2	300	3	4	2	4	2	1	1	Dachshund		2	2	5	30	2	2	0	30	4	3									9
750	1	1	1	2	10	5	2		2	2	8	1	1	3	2	500	3	2	2	1			1	Shih Tzu		1	1	4	50	2	2	1	0	3	2												12
751	1	1	1	1	15	6	1	1	1	3	8	1	1	2	1	4200	2	3	1	2	10	13	1	Yorkshire Terrier		1	1	5	30	2	2	1	0	2	2		2
752	1	1	1	1	15	5	1	1	2	2	7	1	1	1	2	500	2	4	2	1			1	Pug		1	2	6	20	2	2	1	0	2	2	1
753	1	1	1	1	20	9	1	1	2	3	7	1	1	1	1	8400	3	2	2	1			1	Chihuahua		1	2	5	40	2	4	0	30	1	0
754	1	1	1	1	18	9	1	1	1	3	7	1	1	2	1	4400	2	4	2	1			1	Schnauzer		1	1	5	30	2	2	0	30	2	2	1
755	1	1	1	1	17	9	1	1	1	2	7	1	1	10	1	9000	2	2	1	3	8	8	1	Bulldog		1	1	15	20	3	3	4	0	8	8		2	3	4
756	1	1	1	1	13	1	1	1	2	2	6	1	1	1	1	4500	3	3	2	1			2		Unknown	1	2	5	15	2	5	0	30	1	0
757	1	1	1	2	17	1	1	1	1	3	7	1	1	3	2	400	3	4	1	2	2	2	1		Unknown	1	1	20	40	2	2	1	30	2	3	1
758	1	1	1	2	19	6	1	2	1	1	7	1	1	2	1	6800	2	2	1	4	12	12	1	ChowChow		1	1	15	80	4	2	1	30	3	6		2							9
759	1	1	1	1	20	6	1	1	1	2	8	1	1	4	2	670	2	2	2	1			1	Toy Poodle		2	1	2.2	20	2	2	0	30	4	5		2		4	5			8
760	1	1	1	2	10	1	2		2	3	7	1	1	3	2	400	2	3	1	1			1	Poodle		1	1	4	50	2	1	1	0	1	5		2
761	1	1	1	1	9	11	1	1	1	1	8	1	1	2	1	5000	2	1	2	1			2		Unknown	2	1	7	30	2	2	1	0	3	5		2
762	1	1	1	1	18	11	1	4	1	3	6	1	1	2	1	4000	3	4	2	1			1	Yorkshire Terrier		2	1	2	20	2	2	1	0	2	1												12
763	1	1	1	1	18	1	1	1	1	2	7	1	1	3	1	9000	2	2	1	1			1	Maltese		1	1	8	30	2	3	0	20	3	3		2							9			12
764	1	1	1	2	18	9	1	1	1	3	7	2		2	2	250	3	4	2	1			2	Poodle		2	2	4	40	2	4	1	0	15	0
765	1	1	1	1	16	8	2		2	4	7	1	1	2	2	450	2	4	2	1			2	Yorkshire Terrier		1	2	3	30	2	3	1	0	3	0
766	1	1	1	2	20	1	2		2	4	7	1	1	2	1	5000	1	3	1	2	10	4	2		Unknown	2	1	11	36	3	1	0	39	14	2														14
767	1	1	1	1	19	1	1	1	1	2	6	1	1	2	2	400	2	4	2	1			2		Unknown	1	2	8	50	2	2	1	0	2	5	1
768	1	1	1	1	21	12	1	1	1	2	7	1	1	2	1	11000	2	4	2	1			1	Poodle		1	1	5	28	2	2	1	0	3	12		2							9
769	1	1	1	1	12	12	2		2	3	7	1	1	1	1	4000	1	4	2	1			1	Welsh Corgi		1	2	7	35	2	2	1	30	3	6											11	12
770	1	1	1	1	18	5	1	1	1	3	6	1	1	4	1	5000	1	4	2	1			2	Jindo		1	2	15	70	3	2	0	30	1	1	1
771	1	1	1	2	14	8	2		2	2	7	1	2	2	2	450	4	3	2	1			1	Shih Tzu		2	2	6	15	2	2	1	0	24	3				4
772	1	1	1	1	20	12	1	1	1	2	7	1	1	3	1	5000	1	4	1	1			1	Yorkshire Terrier		1	1	3	30	2	3	0	30	2	1							7				11
773	1	1	1	1	14	8	2		2	2	8	2		2	1	6000	2	1	2	1			1	Dachshund		2	2	2	36	2	2	1	5	2	0
774	1	1	1	1	17	9	1	1	2	2	8	1	2	1	2	800	2	4	2	1			2	Border Collie		2	1	12	35	3	1	0	15	3	6	1
775	1	1	1	2	17	2	1	1	1	2	7	1	1	3	2	400	3	2	2	1			1	Bichon Frise		2	2	10	30	2	2	1	1	3	12	1
776	1	1	1	1	14	2	2		2	3	7	1	1	0	1	3000	2	4	2	1			2		Unknown	2	1	6	100	2	3	1	0	3	2	1
777	1	1	1	2	9	3	1	1	2	3	7	1	1	1	2	500	2	3	2	1			1	Maltese		1	1	3.5	40	2	4	1	0	3	0
778	1	1	1	1	18	11	1	4	1	3	6	1	1	3	1	4500	1	4	2	1			1	Cocker spaniel		1	2	9	55	2	2	1	0	3	5	1
779	1	1	1	1	19	5	2		2	2	7	2		2	1	10000	3	4	2	5	11	11	1	Silk Terrier		1	2	4	40	2	2	1	10	9	4		2		4	5
780	1	1	1	2	9	6	2		2	2	6	1	1	3	2	1000	2	3	2	1			1	Pekingese		1	1	7	17	2	4	1	0	10	10			3						9
781	1	1	1	2	14	3	1	1	1	1	7	1	1	5	1	5500	2	2	1	1			1	Chihuahua		2	1	12	55	3	1	1	10	3	1			3
782	1	1	1	1	16	4	1	1	1	3	7	1	1	2	2	320	3	4	1	1			1	Maltese		1	2	2.5	25	2	2	1	0	4	1												12
783	1	1	1	2	18	11	1	1	1	2	7	1	1	4	1	8000	2	3	2	1			1	Yorkshire Terrier		2	1	3	35	2	3	1	0	3	2							7
784	1	1	1	1	19	6	1	1	1	2	7	1	1	3	2	650	2	3	1	1			1	Poodle		1	1	9	60	2	2	0	30	2	12		2		4					9			12
785	1	1	1	1	18	5	1	1	1	2	8	1	1	3	2	800	2	1	2	1			1	Yorkshire Terrier		2	1	4	40	3	4	1	0	1	5					5			8
786	1	1	1	2	12	6	2		2	3	7	1	1	3	2	250	2	2	2	1			1	Poodle		2	1	4	50	2	3	0	30	2	0
787	1	1	1	1	13	3	2		2	2	7	2		2	1	5000	2	4	1	1			1	Maltese		1	1	3	30	2	2	0	30	2	0
788	1	1	1	1	18	4	2		2	4	6	1	1	2	2	400	3	4	2	1			1	Maltese		1	1	2.5	20	2	2	1	0	3	2						6			9
789	1	1	1	2	12	11	1	1	1	1	7	1	1	4	2	450	1	3	1	2	9	9	1	Yorkshire Terrier		2	1	4	20	2	3	1	10	6	15				4		6
790	1	1	1	1	19	2	2		2	2	7	1	2	2	1	10000	2	3	1	2	12	12	2	Yorkshire Terrier		2	2	3	30	2	3	2	30	3	12		2	3						9			12
791	1	1	1	1	21	12	2		2	3	5	1	1	2	1	1	2	4	1	1			1	Standard poodle		2	1	20	60	2	2	1	0	1	1		2		4		6	7
792	1	1	1	2	16	2	2		2	2	7	1	1	3	1	6000	2	1	1	2	5	5	1	Beagle		2	1	5	22	3	2	1	2	4	2		2
793	1	1	1	1	21	4	2		2	3	5	1	2	1	1	5000	3	1	1	1			1	Maltese		2	1	2	60	1	1	2	0	6	12	1
794	1	1	1	2	14	7	1	1	1	2	7	1	1	3	1	6000	2	4	2	1			1	Maltese		1	1	3	30	2	2	1	0	1	6											11	12
795	1	1	1	1	20	12	1	1	1	2	7	1	1	4	2	500	2	4	2	1			1	Poodle		1	2	8	30	2	1	1	0	2	2			3	4
796	1	1	1	1	20	10	1	1	1	3	7	1	1	3	1	7000	2	4	2	2	2	2	1	Pug		2	1	4	45	2	2	1	30	4	6						6			9
797	1	1	1	1	12	7	2		2	3	7	1	1	1	2	450	1	4	2	1			1	Chihuahua		1	1	2	50	2	1	1	0	7	6	1
798	1	1	1	1	20	2	1	1	1	2	8	1	2	2	1	5000	2	4	2	1			1	Yorkshire Terrier		1	1	10	25	2	1	0	30	2	3									9			12
799	1	1	1	1	15	1	2		2	3	7	2		3	2	700	1	4	2	1			2	Pomeranian		1	1	4	30	2	4	1	0	4	2							7				11	12
800	1	1	1	2	6	2	2		2	2	5	2		2	2	600	2	3	2	1			2	Yorkshire Terrier		1	1	4.7	20	2	4	1	0	2	1									9
801	1	1	1	2	17	1	1	1	1	1	8	1	1	4	1	10000	2	2	1	1			2		Unknown	1	2	10	60	2	2	1	1	1	1		2			5	6				10
802	1	1	1	1	19	11	2		2	3	7	1	1	3	1	4000	1	4	2	1			1	Maltese		2	2	3	20	2	2	1	0	11	3			3					8	9
803	1	1	1	1	20	10	1	1	1	3	7	1	1	3	2	330	2	4	2	1			1	Pomeranian		2	1	2.5	30	2	2	1	0	4	5			3			6	7
804	1	1	1	1	17	10	1	1	2	2	8	2		1	1	2000	2	2	1	1			2	Chihuahua		1	2	10	50	2	3	2	0	3	2						6						12
805	1	1	1	2	17	5	1	1	1	2	7	1	1	2	1	5500	2	4	2	1			1	Cocker spaniel		1	2	5	60	2	2	1	1	5	8			3	4					9		11
806	1	1	1	1	15	12	2		2	3	7	1	1	2	1	4500	3	4	2	1			1	Yorkshire Terrier		1	1	3	22	2	3	1	0	3	2	1
807	1	1	1	2	9	5	1	1	1	2	7	1	1	2	2	400	2	4	2	1			1	Shih Tzu		2	2	5	60	2	2	0	30	5	10			3
808	1	1	1	1	3	1	2		2	1	7	1	1	3	2	600	2	3	2	1			1	Shih Tzu		1	1	3	25	2	3	1	0	1	2						6
809	1	1	1	2	19	5	1	1	1	3	7	1	1	4	1	8000	2	3	2	1			1	Golden Retreiver		1	1	18	130	4	2	1	0	3	5		2					7		9
810	1	1	1	1	16	3	2		2	2	7	2		1	2	350	3	4	2	1			2		Unknown	2	1	5	50	2	3	1	0	2	12		2										12
811	1	1	1	1	18	6	1	1	1	3	7	1	1	4	1	8500	2	4	2	1			1	Golden Retreiver		2	1	23	50	4	2	1	30	2	2		2
812	1	1	1	1	13	7	1	1	1	1	7	1	1	5	2	659	2	1	1	2	5	7	1	Maltese		2	2	26	27	3	2	0	40	5	3			3						9
813	1	1	1	1	20	6	1	1	1	3	7	1	1	4	1	9000	2	4	2	1			1	Poodle		1	1	3	40	2	3	1	30	2	3							7		9			12
814	1	1	1	1	19	7	2		2	3	7	1	1	3	2	150	2	4	2	1			2	Yorkshire Terrier		1	1	9	19	2	2	1	31	4	12									9		11	12
815	1	1	1	2	16	4	1	1	1	3	8	1	1	3	2	50	1	4	2	1			1		Unknown	2	2	10	20	1	5	0	40	1	0
816	1	1	1	1	13	7	2		2	3	7	1	1	0	2	270	2	4	2	1			2	Shih Tzu		1	1	6	25	2	2	0	30	4	4									9		11
817	1	1	1	1	20	12	2		2	3	7	1	1	1	2	300	3	4	2	1			1	Maltese		2	2	1	40	1	2	1	0	3	0
818	1	1	1	1	16	1	2		2	3	7	2		2	1	4500	2	4	2	1			1	Schnauzer		2	2	10	20	3	4	1	0	2	3		2							9
819	1	1	1	1	14	8	2		2	3	7	1	1	2	1	3500	2	4	2	1			2		Unknown	1	1	6	25	2	2	1	0	3	10		2							9
820	1	1	1	2	14	3	1	1	1	3	7	1	1	2	2	500	2	2	2	1			1	Maltese		2	1	3	25	2	2	1	30	3	2		2				6
821	1	1	1	1	16	11	1	1	1	2	7	1	1	3	1	10000	2	3	2	2	4	2	1	Cocker spaniel		1	1	12	65	3	1	0	30	3	6											11	12
822	1	1	1	1	16	2	1	1	2	3	6	1	1	1	2	450	3	4	2	1			1	spitz		1	1	8	35	2	4	3	0	4	3									9		11
823	1	1	1	2	20	5	2		2	4	6	1	1	2	2	180	2	4	2	1			2	Cocker spaniel		1	1	3	42	2	3	0	30	5	3									9
824	1	1	1	1	19	3	1	1	1	2	5	1	1	2	1	6000	2	4	2	1			1	Yorkshire Terrier		2	2	2	50	2	2	1	30	3	5		2	3				7
825	1	1	1	1	7	8	1	1	1	2	6	1	1	3	1	14796	2	1	1	2	3	2	1		Unknown	1	1	5	33	1	2	2	2	3	2		2
826	1	1	1	2	15	8	1	1	2	1	8	2		1	2	400	2	4	1	1			1	Miniature Pinscher		2	2	2.7	25	2	1	1	0	15	12			3				7				11	12	13
827	1	1	1	1	15	5	1	1	1	2	6	1	1	4	2	500	2	4	1	1			1	Poodle		1	1	3	10	2	2	1	20	5	8		2			5		7				11
828	1	1	1	2	12	2	1	1	1	1	7	1	1	2	1	7000	3	4	1	1			1	Miniature Pinscher		2	2	8	58	2	5	0	30	1	0
829	1	1	1	2	16	10	1	1	2	3	7	2		2	1	2700	3	4	1	1			1	Jindo		2	2	7	45	2	2	1	30	5	4	1
830	1	1	1	1	13	2	2		2	2	7	1	1	4	2	2500	2	3	2	1			1	Schnauzer		1	1	9	60	3	1	0	30	2	24	1
831	1	1	1	1	13	6	1	1	2	2	6	1	1	1	1	6000	2	3	1	3	15	15	2	Poodle		2	1	5	70	2	4	1	0	5	3		2	3
832	1	1	1	1	14	12	2		2	1	7	1	1	3	2	1000	2	2	2	1			1	Welsh Corgi		1	1	2	30	2	3	0	30	1	2				4								12
833	1	1	1	2	11	4	1	1	1	3	6	2		3	2	200	3	2	2	1			2		Unknown	1	2	10	50	3	1	1	0	24	0
834	1	1	1	1	12	9	1	1	1	1	7	1	1	3	2	1300	2	3	2	1			1	Jindo		1	2	30	50	4	1	1	0	4	30		2	3	4		6			9			12	13
835	1	1	1	1	14	1	1	1	1	2	7	1	1	4	1	3800	2	3	1	2	5	4	1	Maltese		2	2	2	60	2	2	1	30	2	7						6						12	13
836	1	1	1	1	13	7	1	1	1	1	7	1	1	2	2	1400	2	3	2	1			1	Pungsan		1	2	30	50	4	1	1	0	5	40		2	3	4		6	7		9			12	13
837	1	1	1	2	19	6	2		2	3	7	1	1	2	2	800	4	4	2	2	3	3	2	Chihuahua		1	1	5	30	2	1	1	30	8	3						6
838	1	1	1	1	20	3	1	1	1	1	1	1	1	1	1	1	1	4	1	1			1		Unknown	2	1	19	10	1	2	1	1	1	1			3
839	1	1	1	1	17	2	1	1	2	2	6	2		1	1	3000	3	3	2	2	2	2	1	Bichon Frise		2	2	6	30	2	2	0	40	12	5						6					11
840	1	1	1	2	16	3	2		2	2	7	1	1	4	2	200	3	2	2	1			2	Pomeranian		2	2	35	60	2	2	2	30	4	2											11	12
841	1	1	1	2	11	12	1	1	1	3	4	1	1	2	1	5	1	4	1	1			1	Jindo		2	1	8	5	1	1	5	5	5	5		2	3
842	1	1	1	1	19	9	1	1	2	2	8	1	1	1	2	650	3	4	2	1			1	Yorkshire Terrier		1	2	5	50	2	3	0	30	3	4											11	12
843	1	1	1	2	10	1	2		2	3	8	2		5	2	700	3	4	2	2	5	5	1	Maltese		2	2	5	20	2	4	0	30	4	4			3			6						12
844	1	1	1	1	20	9	1	1	2	3	7	1	1	2	2	500	2	2	2	2	6	6	1	Beagle		1	1	12	100	3	3	0	30	1	1	1
845	1	1	1	1	18	1	1	1	1	2	7	1	1	2	2	400	2	1	2	1			1	Cocker spaniel		1	1	10	30	3	1	0	30	2	10						6			9
846	1	1	1	1	18	10	2		2	3	8	2		0	1	5300	2	4	2	1			2	Jindo		1	2	10	50	3	1	1	0	3	1												12
847	1	1	1	1	15	10	2		2	1	7	2		2	1	8000	3	4	2	1			1	Poodle		2	1	7	35	2	1	1	0	1	2	1
848	1	1	1	2	4	11	2		2	3	7	2		4	2	450	2	2	2	1			2		Unknown	2	2	10	65	2	4	1	0	1	1	1
849	1	1	1	2	20	8	1	1	1	3	6	1	1	5	2	400	2	4	2	1			1	Poodle		2	2	10	25	2	2	1	10	4	18											11	12
850	1	1	1	1	19	4	1	1	1	4	6	1	2	3	2	350	2	1	1	1			1	Jindo		1	1	15	50	2	2	1	30	1	2		2			5	6
851	1	1	1	2	8	10	2		2	2	7	1	1	3	2	800	2	4	2	1			2		Unknown	1	1	10	60	2	2	1	0	4	0
852	1	1	1	1	15	4	2		2	4	7	1	1	4	2	500	1	4	2	1			1	Golden Retreiver		2	2	15	45	4	1	2	0	10	10		2							9		11	12
853	1	1	1	1	18	1	1	1	1	2	7	2		3	2	400	2	4	2	1			1	Maltese		2	1	3	250	2	4	1	10	1	2				4		6			9
854	1	1	1	2	16	8	1	1	1	2	6	1	1	3	2	300	2	4	2	1			2		Unknown	2	2	7	50	2	4	1	0	4	0
855	1	1	1	1	13	3	2		2	2	7	1	1	3	2	400	3	1	2	2	12	10	1	Miniature Pinscher		2	2	3	27	2	2	0	20	12	10		2	3	4		6			9			12
856	1	1	1	2	12	7	1	1	2	3	5	2		1	2	100	3	1	1	2	10	10	1	Maltese		1	2	6	75	2	2	0	15	17	3									9					14
857	1	1	1	1	19	7	1	1	1	2	7	1	1	2	2	340	2	4	2	1			1	Poodle		2	1	9	25	2	2	1	0	2	20		2				6			9
858	1	1	1	1	19	4	2		2	3	6	2		3	2	550	1	4	2	1			2	Maltese		2	2	5	40	2	4	1	0	2	3														14
859	1	1	1	1	13	5	1	1	1	1	7	1	1	4	1	4000	2	3	1	2	1	2	1	Shih Tzu		1	1	5	29	2	3	2	1	2	3								8	9
860	1	1	1	1	8	5	2		2	3	7	1	1	1	2	250	1	2	2	1			2		Unknown	1	1	3	60	2	1	0	30	5	5		2									11
861	1	1	1	1	18	11	1	1	1	3	8	1	2	3	1	10000	2	4	2	1			1	Golden Retreiver		1	1	25	120	4	1	1	0	2	5		2					7		9			12
862	1	1	1	1	10	10	2		2	1	7	1	1	3	2	500	2	2	1	2	5	5	1	Pomeranian		1	2	4	35	2	2	1	1	3	5				4	5	6			9			12
863	1	1	1	1	19	4	1	1	1	1	7	1	2	2	2	550	2	2	2	1			1	Maltese		2	2	4	20	2	2	0	25	5	15							7					12
864	1	1	1	1	18	3	1	1	1	2	8	1	1	4	2	700	2	4	2	1			1	Pomeranian		1	1	7	22	2	2	1	10	2	3		2	3			6						12
865	1	1	1	1	18	9	1	1	1	2	7	1	1	3	1	5000	2	4	2	1			1	Cat		2	1	3	40	2	2	1	10	2	10											11
866	1	1	1	2	15	6	2		2	3	8	1	1	4	2	180	3	4	2	2	12	12	1	Maltese		2	1	6.8	20	2	4	0	30	2	1		2											13
867	1	1	1	2	14	2	2		2	2	7	2		0	2	280	2	4	2	1			1	Maltese		2	1	8	32	2	1	0	30	4	4		2							9			12
868	1	1	1	1	1	6	2		2	2	5	2		4	2	10	2	3	2	1			1	Poodle		1	1	11	25	2	2	0	30	2	5						6						12
869	1	1	1	1	15	2	1	1	2	3	7	1	1	1	1	6000	3	4	2	1			1	Maltese		1	1	5	20	2	2	1	0	5	3												12
870	1	1	1	1	19	1	1	1	2	3	7	1	1	2	1	4500	3	3	2	1			2		Unknown	2	2	3.2	65	2	5	0	30	1	4			3			6
871	1	1	1	1	12	10	2		2	2	5	1	1	3	1	2000	2	4	2	3	15	3	1		Unknown	1	1	50	50	3	3	5	5	3	4				4
872	1	1	1	2	8	2	2		2	4	7	2		4	2	1000	2	3	2	1			2		Unknown	1	2	2	20	2	2	0	30	2	1												12
873	1	1	1	2	10	6	1	1	1	1	6	2		5	2	150	2	2	2	2	10	10	2		Unknown	2	2	1.5	20	2	5	0	30	1	2		2									11
874	1	1	1	1	21	6	1	1	1	3	7	1	1	3	1	6000	3	2	2	3	9	7	2	Miniature Pinscher		2	2	6	60	2	4	1	0	5	0
875	1	1	1	1	19	6	1	1	1	2	7	2		2	2	400	2	4	2	2	5	5	1	Miniature Pinscher		1	1	5	33	2	2	1	0	2	2			3						9
876	1	1	1	2	7	10	2		2	3	6	2		3	2	250	3	1	2	1			1	Pomeranian		2	2	3	20	2	4	0	30	8	1	1
877	1	1	1	1	20	10	1	1	1	2	7	1	1	2	2	500	1	3	1	1			1	Chihuahua		1	1	5	14	2	2	1	30	3	1		2			5	6
878	1	1	1	1	18	2	1	1	1	4	6	1	1	2	2	330	3	4	2	2	3	3	1		Unknown	1	2	20	120	3	4	1	0	1	0
879	1	1	1	1	12	12	2		2	3	7	1	1	1	2	240	3	4	2	1			2		Unknown	1	1	3	50	2	3	1	0	5	0
880	1	1	1	2	9	8	2		2	2	7	1	1	3	1	25000	2	4	2	1			1	Cocker spaniel		2	1	5.3	35	2	3	1	0	6	4				4		6					11	12
881	1	1	1	2	10	2	2		2	2	8	1	1	3	1	4400	2	4	2	1			1	Poodle		1	1	7	50	2	2	1	5	3	5	1
882	1	1	1	2	15	5	1	1	1	3	7	1	1	2	1	10314	3	1	2	1			2		Unknown	2	2	3	15	2	2	0	30	2	5			3
883	1	1	1	2	11	3	2		2	2	7	1	1	3	2	700	2	3	2	1			1	Labrador Retriever		2	2	20	130	3	3	1	10	2	1		2
884	1	1	1	2	15	11	1	1	2	3	8	1	1	1	2	700	2	4	2	1			1	Pomeranian		1	1	4.5	40	2	1	0	40	16	1			3	4
885	1	1	1	1	17	6	1	4	1	3	7	1	2	2	1	6000	2	4	2	1			1	Schnauzer		1	1	6	42	2	3	1	0	2	0
886	1	1	1	1	19	12	1	1	1	2	7	1	2	2	1	5000	2	3	2	1			1	Miniature Pinscher		2	1	5	20	2	2	1	0	5	3			3		5	6
887	1	1	1	1	19	12	1	1	1	2	7	1	2	4	2	600	1	4	2	1			2		Unknown	1	2	2	50	2	2	0	30	1	0
888	1	1	1	2	8	7	2		2	2	7	1	1	3	2	1200	2	1	1	7	6	6	1	Cocker spaniel		1	2	12	45	3	2	2	0	3	5														14
889	1	1	1	1	14	8	1	1	2	3	7	1	1	1	1	2700	2	4	2	1			1	Yorkshire Terrier		2	2	3	37	2	2	0	40	6	3												12
890	1	1	1	2	6	4	2		2	3	6	1	1	1	2	400	3	4	2	1			1	spitz		1	1	6	40	2	3	0	40	5	3						6	7					12
891	1	1	1	1	19	7	1	1	1	4	8	2		2	2	520	3	1	2	1			2		Unknown	1	1	5	30	2	4	1	0	1	3	1
892	1	1	1	2	14	11	1	1	1	2	6	1	1	4	2	650	2	2	2	1			1	Pomeranian		2	2	2.8	18	2	2	0	30	5	4						6			9			12
893	1	1	1	1	21	1	2		2	2	7	1	1	3	2	500	2	4	2	1			1	Pomeranian		2	2	5	35	2	4	1	0	2	1						6
894	1	1	1	1	17	12	1	1	1	1	7	1	1	3	2	600	3	2	2	1			2		Unknown	2	2	4	50	2	2	0	30	1	4	1
895	1	1	1	1	17	10	2		2	2	7	2		4	1	8000	2	2	2	8	4	4	2	Jindo		2	2	18	70	3	2	1	1	2	1	1
896	1	1	1	2	8	8	2		2	2	7	1	1	4	1	5000	2	3	2	1			1	Poodle		2	1	10	70	2	2	1	0	1	12												12
897	1	1	1	1	14	9	2		2	2	7	1	1	2	2	200	2	2	1	1			2		Unknown	1	2	5	30	2	2	0	30	5	4		2							9			12
898	1	1	1	1	21	6	1	1	1	1	7	1	1	2	2	400	2	1	2	1			1	Poodle		1	1	20	12	1	1	1	1	1	1	1
899	1	1	1	1	19	3	1	1	1	3	7	1	1	4	1	7000	2	1	2	1			2	Mixed		1	2	5	20	2	4	1	10	1	2									9		11
900	1	1	1	1	21	1	1	1	1	3	6	1	1	4	2	300	2	3	1	2	7	3	1	Poodle		1	2	4	25	2	1	1	0	2	2		2							9
901	1	1	1	1	13	9	2		2	3	8	1	1	0	1	1000	3	4	2	1			1	Maltese		1	1	5	10	2	2	0	30	1	5			3
902	1	1	1	2	9	6	2		2	2	7	1	1	3	2	1000	2	4	2	1			1	Maltese		2	1	4	20	2	1	1	30	6	3	1
903	1	1	1	2	8	9	2		2	3	7	1	1	0	2	300	2	2	1	1			1	Toy Poodle		2	1	2.2	35	2	3	1	30	2	3												12	13
904	1	1	1	1	21	12	1	1	1	2	7	1	1	3	1	5500	2	4	1	2	5	3	1	Chihuahua		1	2	5	60	2	2	0	30	2	2		2				6			9
905	1	1	1	1	13	2	2		2	4	7	1	1	2	2	400	2	4	2	1			2		Unknown	1	2	5	50	2	2	0	30	1	3						6
906	1	1	1	1	15	2	2		2	3	7	1	3	4	2	500	2	4	2	1			2		Unknown	1	2	5	100	3	5	0	30	1	1	1
907	1	1	1	1	12	10	2		2	3	7	1	1	1	1	9000	2	4	1	1			1	Bulldog		1	1	9	90	2	2	1	1	2	2		2	3
908	1	1	1	1	17	1	2		2	3	7	1	1	1	2	500	2	4	1	2	3	2	1	Cocker spaniel		1	1	12	14	3	2	0	10	2	2				4			7
909	1	1	1	1	17	4	1	1	1	2	7	1	1	3	2	300	2	2	1	1			2		Unknown	2	2	13	133	2	2	1	1	2	3	1
910	1	1	1	1	17	7	1	1	1	2	6	1	1	4	2	350	2	2	2	1			1	Chihuahua		2	1	4	18	2	2	1	10	5	4				4					9
911	1	1	1	1	11	7	1	1	1	1	5	1	1	3	2	300	2	4	1	2	3	3	2	Poodle		2	2	4	30	2	3	1	30	2	2					5	6			9		11	12
912	1	1	1	2	12	7	2		2	2	7	1	1	1	2	300	2	4	2	1			1	Maltese		1	1	3	30	2	1	0	30	5	10		2				6	7		9		11	12
913	1	1	1	2	15	9	2		2	3	7	1	1	3	2	400	1	4	2	1			1	Poodle		2	2	1	20	2	2	1	0	1	1	1
914	1	1	1	2	10	8	2		2	2	7	1	1	3	2	950	2	3	2	1			1	Poodle		2	1	8	20	2	2	0	30	3	8									9		11	12
915	1	1	1	2	11	4	2		2	1	7	1	1	0	1	2600	3	2	2	1			1	Maltese		1	1	5	40	2	2	0	50	6	4		2	3						9			12
916	1	1	1	2	20	11	1	1	1	3	7	1	1	2	1	6000	1	2	2	1			1	Shih Tzu		1	2	4	30	2	2	1	20	1	2	1
917	1	1	1	1	19	1	1	1	1	4	7	2		2	1	4500	2	4	2	1			1	Cocker spaniel		1	1	12	90	3	2	0	30	5	2		2				6	7
918	1	1	1	1	17	3	1	1	2	2	7	1	1	1	2	550	2	4	1	2	5	5	1	Poodle		1	1	5	50	2	2	1	30	5	4									9	10	11
919	1	1	1	2	10	8	2		2	2	6	1	1	3	2	850	2	3	2	1			1	Poodle		1	1	8	15	2	2	0	30	3	3											11	12	13
920	1	1	1	2	17	8	1	1	1	3	7	1	1	3	1	10000	2	3	2	1			2		Unknown	1	1	4	40	2	4	1	0	1	1				4			7
921	1	1	1	2	6	12	2		2	2	7	2		0	1	500	3	4	2	1			1	Maltese		1	1	3	30	2	2	1	0	3	5	1
922	1	1	1	1	21	11	1	1	1	2	7	2		3	2	400	2	4	2	1			1	Maltese		1	1	3	30	2	1	1	0	1	1	1
923	1	1	1	1	16	4	1	1	1	2	7	1	1	3	1	7000	2	2	2	1			2		Unknown	1	1	10	15	3	4	1	0	1	3		2		4
924	1	1	1	1	18	3	1	1	1	2	7	1	1	2	1	4500	2	4	2	1			1	Maltese		2	1	2	50	2	3	1	30	3	6			3	4					9			12
925	1	1	1	1	19	10	1	1	1	2	7	1	1	3	1	4000	2	3	2	1			1	Schnauzer		1	1	15	40	3	3	1	0	1	3		2				6			9
926	1	1	1	1	21	3	1	1	1	1	7	1	1	4	1	15000	2	4	2	2	10	10	1	Maltese		1	1	5	30	2	2	1	0	5	12		2	3			6			9		11
927	1	1	1	1	17	12	1	1	1	3	7	1	1	3	2	400	2	1	1	1			1		Unknown	1	1	10	60	3	2	1	60	4	1	1
928	1	1	1	1	16	4	1	1	1	2	5	1	1	4	2	340	2	2	1	2	3	2	1	Chihuahua		1	1	4	10	2	3	2	3	3	4			3		5		7	8	9
929	1	1	1	2	10	2	2		2	3	8	1	1	4	2	500	2	4	2	1			1	Pomeranian		2	1	2.6	17	2	1	1	10	3	2	1
930	1	1	1	1	17	8	2		2	3	7	1	1	3	1	800	2	4	2	1			1	Yorkshire Terrier		1	2	5	50	2	2	1	0	2	1					5
931	1	1	1	1	16	1	1	1	1	2	7	1	1	3	1	6000	1	4	1	2	7	7	1	Dachshund		1	1	5	25	2	1	1	0	3	3						6
932	1	1	1	1	14	4	2		2	2	7	1	1	3	2	600	2	3	1	2	10	10	2		Unknown	1	1	7	35	2	2	1	0	6	2						6
933	1	1	1	1	15	4	2		2	2	7	1	1	3	2	500	2	4	2	2	5	5	1	Yorkshire Terrier		2	2	13	10	3	2	1	10	4	0
934	1	1	1	2	18	1	1	1	1	4	7	2		4	2	550	2	1	2	1			1	Miniature Pinscher		2	1	5	40	2	4	0	30	1	6	1
935	1	1	1	1	2	12	2		2	3	8	1	1	1	2	500	2	3	2	1			1	Yorkshire Terrier		2	2	7	50	2	1	1	0	1	0
936	1	1	1	2	9	3	2		2	3	7	1	1	0	2	200	2	2	2	1			1	Maltese		1	1	5	65	2	4	0	30	1	5											11		13
937	1	1	1	1	5	2	1	1	1	3	7	1	2	2	1	6000	2	4	2	1			1	Pomeranian		1	1	3	50	2	2	2	0	3	4												12
938	1	1	1	1	18	1	1	1	2	3	7	1	1	2	1	7000	3	2	1	1			1	Poodle		2	1	5	20	3	2	0	30	2	12	1
939	1	1	1	2	11	10	2		2	3	7	1	1	1	2	250	3	2	1	2	2	2	1	French Bulldog		1	1	16	50	3	2	0	40	12	10						6			9		11	12	13
940	1	1	1	2	13	8	2		2	3	7	1	1	3	2	800	2	4	2	1			2	Maltese		1	1	3.5	50	2	4	1	0	4	3		2
941	1	1	1	2	11	9	1	1	1	1	8	1	1	2	1	3000	1	4	2	1			1	Maltese		2	2	4	15	2	2	1	10	2	1											11
942	1	1	1	1	12	11	2		2	3	8	1	3	5	2	200	2	2	1	2	10	5	1	Maltese		2	2	5	10	2	3	1	10	1	2		2	3	4	5	6	7	8	9	10	11	12	13
943	1	1	1	2	9	1	2		2	3	7	1	1	2	2	700	3	4	2	1			2		Unknown	1	2	3.4	35	2	3	1	30	3	6	1
944	1	1	1	2	6	6	2		2	3	7	1	1	4	2	150	2	4	2	1			1	Poodle		2	2	3.8	26	3	2	0	30	8	4		2	3						9
945	1	1	1	1	13	12	1	1	1	2	7	1	1	3	1	4500	2	4	2	1			1	Poodle		1	1	5	50	2	2	1	30	3	2									9				13
946	1	1	1	1	12	12	1	1	1	1	7	1	1	4	2	800	2	2	1	2	14	14	1	Maltese		1	1	13	65	3	3	1	2	3	4		2	3				7
947	1	1	1	1	15	8	1	1	1	3	7	1	1	3	1	15000	2	4	2	1			1	Jindo		1	1	12	100	3	2	1	20	3	12												12
948	1	1	1	2	10	2	2		2	3	7	2		3	2	400	4	3	1	2	7	7	1	Maltese		2	2	12	14	2	4	0	30	20	0
949	1	1	1	1	12	2	2		2	3	7	1	1	2	2	700	1	4	2	1			1	Yorkshire Terrier		1	1	6	15	2	2	0	30	2	2											11	12
950	1	1	1	1	17	9	2		2	2	7	1	1	3	2	430	2	4	1	2	4	4	1	Dachshund		1	2	6	35	2	2	1	1	1	4	1
951	1	1	1	1	14	9	2		2	2	8	1	1	3	1	5500	2	1	2	2	2	2	1	Shih Tzu		1	2	7	50	2	2	0	30	1	5		2							9
952	1	1	1	1	14	11	2		2	3	7	2		0	2	200	3	2	2	1			2	Jindo		2	2	10	70	3	2	1	30	5	12									9		11	12
953	1	1	1	1	5	4	2		2	3	7	1	1	4	2	200	3	2	1	1			1	Maltese		1	2	7	50	2	2	1	0	5	3		2		4						10	11
954	1	1	1	1	19	4	1	1	1	3	7	1	1	3	2	1000	2	4	2	1			2		Unknown	2	1	1	15	1	3	1	0	1	1	1
955	1	1	1	1	9	8	2		2	1	7	1	1	4	2	1200	1	2	2	1			1		Unknown	2	1	10	20	2	2	1	20	4	3		2		4
956	1	1	1	1	17	4	2		2	2	7	2		1	1	4000	2	4	2	1			2		Unknown	2	1	7	10	2	4	1	1	1	1	1
957	1	1	1	2	11	4	1	1	1	2	7	1	1	4	2	300	3	3	1	1			1	Siberian Husky		1	1	2	10	4	2	2	30	3	2								8		10
958	1	1	1	1	20	3	1	1	2	2	7	1	1	2	1	8000	2	4	2	2	3	3	1	Pomeranian		1	1	2.5	18	2	1	1	10	4	3												12
959	1	1	1	1	20	5	1	1	1	2	7	1	1	2	2	1000	2	2	2	1			1	Maltese		1	1	4	45	2	3	1	0	3	5		2
960	1	1	1	1	20	11	1	1	1	3	7	1	2	5	2	400	3	2	1	1			1	Jindo		1	2	12	62	3	1	0	30	4	2	1
961	1	1	1	2	9	3	2		2	2	7	1	1	1	1	6000	1	2	2	1			1	Shih Tzu		2	1	1	10	1	1	1	0	1	0
962	1	1	1	1	15	10	1	1	1	2	8	1	1	2	2	350	2	4	2	1			1	Jindo		1	2	5	60	3	3	1	30	1	4	1
963	1	1	1	1	18	12	2		2	2	7	1	1	2	2	400	3	4	2	1			2	Shih Tzu		2	1	7	18	2	2	1	6	4	2						6					11	12
964	1	1	1	2	11	2	2		2	2	8	1	1	3	1	333	2	2	2	2	2	2	2		Unknown	2	2	3	3	2	2	2	2	2	1					5
965	1	1	1	2	11	8	2		2	3	6	1	1	3	1	5000	2	2	1	1			1	Maltese		2	1	3	20	2	5	0	30	1	4							7							14
966	1	1	1	2	4	7	2		2	1	7	1	1	3	2	500	2	1	2	1			2	Mixed		2	2	5	40	3	2	4	0	5	2									9
967	1	1	1	1	16	12	1	1	1	3	8	1	1	2	1	8000	2	4	2	1			1	Maltese		1	1	5	50	2	2	0	30	2	2		2										12
968	1	1	1	1	12	2	1	1	1	1	7	1	1	2	2	260	2	3	1	1			1	Maltese		1	1	3	30	2	2	1	2	1	1	1
969	1	1	1	2	8	6	2		2	2	7	2		0	1	4400	3	4	2	1			1	Pomeranian		1	1	4	40	2	3	1	0	3	2							7
970	1	1	1	2	19	6	2		2	3	6	1	1	1	2	300	3	4	2	1			2	Chihuahua		1	1	7	40	2	4	1	0	10	0
971	1	1	1	1	21	9	1	1	1	3	7	1	1	3	1	4500	2	4	2	1			1	Poodle		2	2	2.5	35	2	2	0	20	1	3									9			12
972	1	1	1	1	18	6	2		2	3	7	2		4	2	400	2	3	2	1			2	Poodle		1	2	4	60	2	2	1	15	5	2	1
973	1	1	1	1	15	1	1	1	1	2	7	1	1	2	1	6000	2	4	2	1			1	Chihuahua		1	1	5	30	2	3	1	0	1	4									9
974	1	1	1	1	19	5	1	1	1	2	7	1	1	4	1	5000	2	4	2	1			1	Pekingese		1	2	4	19	2	2	1	10	2	0
975	1	1	1	2	10	3	2		2	2	7	2		1	1	2800	3	4	2	1			1	Poodle		1	1	6	20	2	2	1	50	12	10		2	3			6					11	12	13
976	1	1	1	2	8	5	2		2	2	8	1	1	2	2	400	2	2	2	1			1	Shih Tzu		2	1	10	25	2	2	1	0	3	5									9
977	1	1	1	1	21	11	1	1	1	2	8	1	1	4	1	5000	2	2	2	2	5	5	1	Yorkshire Terrier		2	2	3	70	2	4	0	30	1	3	1
978	1	1	1	2	9	1	2		2	2	7	1	1	2	1	5000	3	3	1	1			1	Maltese		1	1	5	50	2	3	1	0	2	3												12
979	1	1	1	2	14	4	2		2	3	7	1	1	3	2	500	3	4	2	1			1	Maltese		2	2	8	50	2	2	1	0	5	6	1
980	1	1	1	2	12	4	1	1	1	2	8	1	1	7	2	1000	2	2	1	3	2	2	1	Beagle		1	1	5	70	2	1	2	2	2	5		2	3	4	5	6	7	8	9	10	11	12	13
981	1	1	1	2	21	8	2		2	3	7	2		3	2	500	2	4	2	1			2		Unknown	2	2	3	30	2	2	1	30	5	3	1
982	1	1	1	2	15	5	1	1	1	2	7	1	1	3	2	550	2	4	2	1			1	Pomeranian		2	1	3	18	2	1	0	30	4	6	1
983	1	1	1	1	21	10	1	1	1	1	7	1	1	4	1	1000	2	2	1	2	7	5	1	Cane Corso		2	1	50	45	1	1	1	30	2	5		2	3	4	5	6
984	1	1	1	2	5	9	2		2	2	7	1	1	3	2	800	1	2	2	1			2	Chihuahua		2	2	5	50	2	2	1	0	2	5		2		4		6
985	1	1	1	2	17	5	1	1	1	2	7	1	3	2	2	450	2	3	2	1			1	Chihuahua		2	2	5	45	2	2	1	0	2	3												12
986	1	1	1	2	18	7	1	1	1	3	7	1	2	3	2	800	2	2	2	1			1	Poodle		2	1	4	20	2	2	0	30	8	3						6						12
987	1	1	1	2	16	7	2		2	3	7	1	1	2	2	240	3	4	2	1			1	Poodle		1	1	6	37	2	1	1	20	20	24		2					7		9		11	12
988	1	1	1	2	20	12	1	1	1	2	7	2		4	2	850	2	4	2	1			1	Poodle		1	1	8	50	3	4	1	0	5	3	1
989	1	1	1	2	12	8	1	1	1	3	7	1	1	4	1	4000	1	4	1	1			1	Welsh Corgi		2	1	6	30	2	1	1	30	2	3				4
990	1	1	1	2	12	1	1	1	1	2	7	1	1	2	2	900	2	2	2	1			1	Chihuahua		2	2	5	25	2	1	0	30	3	12	1
991	1	1	1	2	15	6	1	1	1	2	8	1	2	2	1	1000	2	1	2	1			1	Yorkshire Terrier		1	1	8	50	1	1	0	30	3	6			3			6	7
992	1	1	1	1	16	9	1	1	1	4	7	1	1	2	2	650	3	4	2	1			1	Miniature Pinscher		1	1	10	45	2	1	0	30	14	50						6			9		11			14
993	1	1	1	2	14	2	1	1	2	2	7	1	1	1	2	400	2	3	2	2	15	15	1	Siberian Husky		2	2	20	110	3	2	1	0	5	4		2					7					12	13
994	1	1	1	2	15	8	1	1	1	3	7	1	1	3	2	500	2	4	1	1			1	Poodle		2	1	4.2	35	2	2	0	25	16	2	1
995	1	1	1	2	14	3	1	1	1	2	7	1	1	3	1	3000	2	1	2	1			1	Maltese		2	1	7	50	2	2	1	0	1	0
996	1	1	1	2	19	10	2		2	2	7	1	1	1	1	4000	3	1	2	1			1	Maltese		1	1	2.3	15	2	2	1	0	10	10				4		6							13
997	1	1	1	2	14	4	1	1	1	2	7	1	1	3	1	200	2	3	2	1			2	Shih Tzu		1	2	40	110	2	2	1	0	6	2			3						9
998	1	1	1	1	11	1	1	1	1	2	6	1	1	3	1	3500	3	3	2	1			1	Maltese		1	1	10	7	3	2	1	0	2	5									9
999	1	1	1	2	21	6	2		2	3	5	1	1	2	2	400	3	2	2	2	15	10	1	Poodle		2	2	3	35	2	2	0	40	5	3		2							9			12
1000	1	1	1	2	18	12	2		2	3	7	1	2	4	2	700	2	4	2	1			2	Poodle		1	1	9	30	2	1	1	0	4	5						6
1001	1	1	1	2	6	6	2		2	2	7	1	1	3	1	1000	2	4	2	1			1	Maltese		2	2	2	40	2	2	1	0	1	2		2
1002	1	1	2	2	10	7	2		2	1	8	1	1	3	2	1500	2
1003	1	1	1	2	8	10	2		2	2	7	1	1	3	2	550	3	2	2	1			1	spitz		1	1	10	60	2	1	1	0	3	2														14
1004	1	1	1	2	5	8	1	1	1	3	7	1	2	2	1	5000	2	2	1	3	2	2	1	Bulldog		1	1	10	4	3	3	1	2	3	3				4		6	7
1005	1	1	1	1	19	3	1	1	1	3	7	1	1	4	1	4000	3	4	2	1			1	Jindo		1	2	15	70	3	2	1	0	1	3										10	11	12
1006	1	1	2	2	12	4	1	1	2	3	7	1	1	1	1	5700	3
1007	1	1	2	2	12	11	2		2	2	6	1	1	2	1	3000	3
1008	1	1	2	2	9	6	2		2	2	7	1	1	4	1	4000	2
1009	1	1	1	2	14	3	2		2	3	7	1	1	1	2	250	3	4	2	1			1	Poodle		1	1	13	50	3	2	1	30	3	2	1
1010	1	1	1	2	8	12	2		2	3	8	1	1	3	2	750	2	4	2	1			1	Pomeranian		1	2	3	22	2	2	0	40	2	10		2									11	12
1011	1	1	1	2	17	12	1	1	1	3	6	1	1	3	2	300	3	1	2	1			1	Maltese		1	1	3.5	15	1	2	1	0	1	2	1
1012	1	1	1	2	21	6	1	1	2	3	6	2		3	1	3000	3	1	1	1			1	Jindo		2	2	22	50	3	2	1	0	3	5						6						12
1013	1	1	1	2	14	2	1	1	1	2	6	1	1	2	1	30000	1	1	1	1			1	Poodle		2	2	8	1	2	2	1	0	1	1									9
1014	1	1	1	1	14	11	2		2	2	7	1	1	2	1	10000	2	4	2	1			1	Welsh Corgi		1	1	8	30	2	1	0	40	5	2		2									11	12
[truncated: 20 more columns]
